# Supplementary material for: Chemoproteomic profiling reveals celastrol as a potential modulator of cholesterol signaling
Source: Royal Society of Chemistry journal article supplement (doi:10.1039/d1cc05986f), 2022-01-01
Supplement: d1cc05986f2.xlsx [file d1cc05986f2.xlsx]

## Sheet: Table S1
Table S1 Full list of celastrol targets in MCF-7 cells.
ID	Description	Log2-Renrichment			Log2-RCompetition			Cholesterol Target [22]	Bile acid Targets [23]
		1st	2nd	Avg.	1st	2nd	Avg.
P07237	Protein disulfide-isomerase OS=Homo sapiens OX=9606 GN=P4HB PE=1 SV=3	3.48414	3.47508	3.47	3.14893	3.11603	3.13		√
P07900	Heat shock protein HSP 90-alpha OS=Homo sapiens OX=9606 GN=HSP90AA1 PE=1 SV=5	3.19377	3.19849	3.19	3.04264	2.98732	3.01
Q12905	Interleukin enhancer-binding factor 2 OS=Homo sapiens OX=9606 GN=ILF2 PE=1 SV=2	3.54967	3.37712	3.46	2.88557	3.04789	2.96
P08238	Heat shock protein HSP 90-beta OS=Homo sapiens OX=9606 GN=HSP90AB1 PE=1 SV=4	3.27202	3.20477	3.23	2.97636	2.92979	2.95
Q8IY21	Probable ATP-dependent RNA helicase DDX60 OS=Homo sapiens OX=9606 GN=DDX60 PE=1 SV=3	4.04789	3.3147	3.68	2.72683	3.07895	2.9
Q16543	Hsp90 co-chaperone Cdc37 OS=Homo sapiens OX=9606 GN=CDC37 PE=1 SV=1	3.16189	3.20477	3.18	2.82171	2.90304	2.86
P19525	Interferon-induced, double-stranded RNA-activated protein kinase OS=Homo sapiens OX=9606 GN=EIF2AK2 PE=1 SV=2	3.37573	3.41819	3.39	2.79077	2.91839	2.85
Q460N5	Protein mono-ADP-ribosyltransferase PARP14 OS=Homo sapiens OX=9606 GN=PARP14 PE=1 SV=3	3.44758	3.19535	3.32	2.65535	3.0054	2.83
P63104	14-3-3 protein zeta/delta OS=Homo sapiens OX=9606 GN=YWHAZ PE=1 SV=1	3.31179	3.16189	3.23	2.62761	3.01257	2.82
P78417	Glutathione S-transferase omega-1 OS=Homo sapiens OX=9606 GN=GSTO1 PE=1 SV=2	3.22959	3.1635	3.19	2.80116	2.85	2.82		√
P49591	Serine--tRNA ligase, cytoplasmic OS=Homo sapiens OX=9606 GN=SARS1 PE=1 SV=3	3.1177	3.44095	3.27	2.46205	3.17792	2.81
P63208	S-phase kinase-associated protein 1 OS=Homo sapiens OX=9606 GN=SKP1 PE=1 SV=2	3.07211	3.19692	3.13	2.52857	3.0993	2.81
P06744	Glucose-6-phosphate isomerase OS=Homo sapiens OX=9606 GN=GPI PE=1 SV=4	3.18745	3.07382	3.13	2.66448	2.9241	2.79
O14787	Transportin-2 OS=Homo sapiens OX=9606 GN=TNPO2 PE=1 SV=3	3.08236	3.57773	3.33	2.46467	3.10769	2.78
Q15365	Poly(rC)-binding protein 1 OS=Homo sapiens OX=9606 GN=PCBP1 PE=1 SV=2	2.97453	2.8953	2.93	2.64386	2.92029	2.78
P61978	Heterogeneous nuclear ribonucleoprotein K OS=Homo sapiens OX=9606 GN=HNRNPK PE=1 SV=1	3.12433	3.31904	3.22	2.50589	3.05137	2.77
O95786	Antiviral innate immune response receptor RIG-I OS=Homo sapiens OX=9606 GN=DDX58 PE=1 SV=2	3.08576	2.91648	3	2.58496	2.93923	2.76
P27348	14-3-3 protein theta OS=Homo sapiens OX=9606 GN=YWHAQ PE=1 SV=1	3.0054	3.08576	3.04	2.59694	2.8953	2.74
P21964	Catechol O-methyltransferase OS=Homo sapiens OX=9606 GN=COMT PE=1 SV=2	2.99095	2.88557	2.93	2.70929	2.7866	2.74	√	√
Q9Y6K5	2'-5'-oligoadenylate synthase 3 OS=Homo sapiens OX=9606 GN=OAS3 PE=1 SV=3	2.76765	3.18269	2.97	2.45154	3.0036	2.72
Q9UL46	Proteasome activator complex subunit 2 OS=Homo sapiens OX=9606 GN=PSME2 PE=1 SV=4	2.99277	3.23879	3.11	2.41684	3.01257	2.71
P62979	Ubiquitin-40S ribosomal protein S27a OS=Homo sapiens OX=9606 GN=RPS27A PE=1 SV=2	2.55827	2.74201	2.65	2.54597	2.87578	2.71	√
P11142	Heat shock cognate 71 kDa protein OS=Homo sapiens OX=9606 GN=HSPA8 PE=1 SV=1	3.05832	3.04089	3.04	2.4957	2.87971	2.68
O60506	Heterogeneous nuclear ribonucleoprotein Q OS=Homo sapiens OX=9606 GN=SYNCRIP PE=1 SV=2	2.8953	3.16511	3.03	2.488	2.86196	2.67
P31946	14-3-3 protein beta/alpha OS=Homo sapiens OX=9606 GN=YWHAB PE=1 SV=3	2.95233	3.10769	3.03	2.53854	2.81967	2.67
P43487	Ran-specific GTPase-activating protein OS=Homo sapiens OX=9606 GN=RANBP1 PE=1 SV=1	2.78031	2.9855	2.88	2.38957	2.93923	2.66
P09429	High mobility group protein B1 OS=Homo sapiens OX=9606 GN=HMGB1 PE=1 SV=3	2.88753	2.73552	2.81	2.55336	2.7761	2.66
Q96RS6	NudC domain-containing protein 1 OS=Homo sapiens OX=9606 GN=NUDCD1 PE=1 SV=2	2.93546	2.91648	2.92	2.41143	2.87381	2.64
P30101	Protein disulfide-isomerase A3 OS=Homo sapiens OX=9606 GN=PDIA3 PE=1 SV=4	2.88362	2.81967	2.85	2.67356	2.61589	2.64		√
P42224	Signal transducer and activator of transcription 1-alpha/beta OS=Homo sapiens OX=9606 GN=STAT1 PE=1 SV=2	2.87184	3.05311	2.96	2.41143	2.84599	2.62
P18031	Tyrosine-protein phosphatase non-receptor type 1 OS=Homo sapiens OX=9606 GN=PTPN1 PE=1 SV=1	2.91648	2.84197	2.87	2.61824	2.63691	2.62	√	√
O95340	Bifunctional 3'-phosphoadenosine 5'-phosphosulfate synthase 2 OS=Homo sapiens OX=9606 GN=PAPSS2 PE=1 SV=2	2.76977	3.1635	2.96	2.29278	2.94111	2.61
P31689	DnaJ homolog subfamily A member 1 OS=Homo sapiens OX=9606 GN=DNAJA1 PE=1 SV=2	3.16832	2.73769	2.95	2.44095	2.7845	2.61
P31947	14-3-3 protein sigma OS=Homo sapiens OX=9606 GN=SFN PE=1 SV=1	2.63227	3.03738	2.83	2.43563	2.79494	2.61
P54578	Ubiquitin carboxyl-terminal hydrolase 14 OS=Homo sapiens OX=9606 GN=USP14 PE=1 SV=3	3.50335	3.3799	3.44	2.64386	2.55827	2.6
Q6AI08	HEAT repeat-containing protein 6 OS=Homo sapiens OX=9606 GN=HEATR6 PE=1 SV=1	2.9241	3.17792	3.05	2.45154	2.76129	2.6
P60903	Protein S100-A10 OS=Homo sapiens OX=9606 GN=S100A10 PE=1 SV=2	2.43296	2.38128	2.4	2.37573	2.79077	2.58
Q8TDB6	E3 ubiquitin-protein ligase DTX3L OS=Homo sapiens OX=9606 GN=DTX3L PE=1 SV=1	2.9982	4.02148	3.5	2.25096	2.89724	2.57
Q14019	Coactosin-like protein OS=Homo sapiens OX=9606 GN=COTL1 PE=1 SV=3	2.80529	2.86196	2.83	2.45681	2.69822	2.57
P25685	DnaJ homolog subfamily B member 1 OS=Homo sapiens OX=9606 GN=DNAJB1 PE=1 SV=4	2.68706	2.92029	2.8	2.25701	2.88753	2.57
Q16678	Cytochrome P450 1B1 OS=Homo sapiens OX=9606 GN=CYP1B1 PE=1 SV=2	3.27202	3.09761	3.18	2.29866	2.82985	2.56
P35659	Protein DEK OS=Homo sapiens OX=9606 GN=DEK PE=1 SV=1	2.97636	3.07039	3.02	2.64386	2.488	2.56
Q8IXQ6	Protein mono-ADP-ribosyltransferase PARP9 OS=Homo sapiens OX=9606 GN=PARP9 PE=1 SV=2	3.22959	3.1811	3.2	2.37573	2.73118	2.55
Q02218	2-oxoglutarate dehydrogenase, mitochondrial OS=Homo sapiens OX=9606 GN=OGDH PE=1 SV=3	3.11103	2.96347	3.03	2.44361	2.67356	2.55
P55884	Eukaryotic translation initiation factor 3 subunit B OS=Homo sapiens OX=9606 GN=EIF3B PE=1 SV=3	3.14893	3.07895	3.11	2.50335	2.58015	2.54
Q5JWF2	Guanine nucleotide-binding protein G(s) subunit alpha isoforms XLas OS=Homo sapiens OX=9606 GN=GNAS PE=1 SV=2	2.98185	2.98003	2.98	2.48543	2.61353	2.54
Q14974	Importin subunit beta-1 OS=Homo sapiens OX=9606 GN=KPNB1 PE=1 SV=2	2.9855	2.86592	2.92	2.44361	2.64155	2.54
Q96CW1	AP-2 complex subunit mu OS=Homo sapiens OX=9606 GN=AP2M1 PE=1 SV=2	2.99095	3.03562	3.01	2.48027	2.58737	2.53
O43252	Bifunctional 3'-phosphoadenosine 5'-phosphosulfate synthase 1 OS=Homo sapiens OX=9606 GN=PAPSS1 PE=1 SV=2	2.51602	3.37712	2.94	2.16027	2.90689	2.53
P34932	Heat shock 70 kDa protein 4 OS=Homo sapiens OX=9606 GN=HSPA4 PE=1 SV=4	2.78031	2.82782	2.8	2.34767	2.72247	2.53
P09110	3-ketoacyl-CoA thiolase, peroxisomal OS=Homo sapiens OX=9606 GN=ACAA1 PE=1 SV=2	2.66676	2.63923	2.65	2.4957	2.58015	2.53
P49368	T-complex protein 1 subunit gamma OS=Homo sapiens OX=9606 GN=CCT3 PE=1 SV=4	2.84398	2.90689	2.87	2.31615	2.73335	2.52
P04792	Heat shock protein beta-1 OS=Homo sapiens OX=9606 GN=HSPB1 PE=1 SV=2	2.61353	2.73985	2.67	2.24489	2.80941	2.52
P28066	Proteasome subunit alpha type-5 OS=Homo sapiens OX=9606 GN=PSMA5 PE=1 SV=3	2.60407	2.7137	2.65	2.58976	2.45418	2.52
P80303	Nucleobindin-2 OS=Homo sapiens OX=9606 GN=NUCB2 PE=1 SV=3	3.29866	3.60288	3.45	2.52356	2.51602	2.51		√
P26639	Threonine--tRNA ligase 1, cytoplasmic OS=Homo sapiens OX=9606 GN=TARS1 PE=1 SV=3	2.73335	3.01078	2.87	2.28688	2.75275	2.51
P68371	Tubulin beta-4B chain OS=Homo sapiens OX=9606 GN=TUBB4B PE=1 SV=1	2.95047	2.8953	2.92	2.31034	2.69599	2.5
Q01650	Large neutral amino acids transporter small subunit 1 OS=Homo sapiens OX=9606 GN=SLC7A5 PE=1 SV=2	2.43829	3.40463	2.92	2.18587	2.8339	2.5	√
P22314	Ubiquitin-like modifier-activating enzyme 1 OS=Homo sapiens OX=9606 GN=UBA1 PE=1 SV=3	2.78031	2.96717	2.87	2.29572	2.70487	2.5
Q15008	26S proteasome non-ATPase regulatory subunit 6 OS=Homo sapiens OX=9606 GN=PSMD6 PE=1 SV=1	2.74416	2.70487	2.72	2.35332	2.65076	2.5
O60502	Protein O-GlcNAcase OS=Homo sapiens OX=9606 GN=OGA PE=1 SV=2	3.08746	3.05311	3.07	2.46989	2.52105	2.49
O75534	Cold shock domain-containing protein E1 OS=Homo sapiens OX=9606 GN=CSDE1 PE=1 SV=2	2.57289	3.22651	2.89	2.04614	2.93546	2.49
O76003	Glutaredoxin-3 OS=Homo sapiens OX=9606 GN=GLRX3 PE=1 SV=2	2.75061	2.72465	2.73	2.49825	2.49313	2.49
P29373	Cellular retinoic acid-binding protein 2 OS=Homo sapiens OX=9606 GN=CRABP2 PE=1 SV=2	2.13422	2.13093	2.13	2.29572	2.69153	2.49
Q92973	Transportin-1 OS=Homo sapiens OX=9606 GN=TNPO1 PE=1 SV=2	3.02148	3.06867	3.04	2.32481	2.62761	2.47
Q9H3U1	Protein unc-45 homolog A OS=Homo sapiens OX=9606 GN=UNC45A PE=1 SV=1	2.73335	3.27798	3	2.14078	2.81352	2.47
Q96EK5	KIF-binding protein OS=Homo sapiens OX=9606 GN=KIFBP PE=1 SV=1	3.0018	2.93168	2.96	2.48285	2.46728	2.47
Q13200	26S proteasome non-ATPase regulatory subunit 2 OS=Homo sapiens OX=9606 GN=PSMD2 PE=1 SV=3	2.91073	2.89918	2.9	2.36737	2.58496	2.47
P0CG38	POTE ankyrin domain family member I OS=Homo sapiens OX=9606 GN=POTEI PE=3 SV=1	2.68032	1.67807	2.17	2.49313	2.4489	2.47
O00429	Dynamin-1-like protein OS=Homo sapiens OX=9606 GN=DNM1L PE=1 SV=2	3.26303	2.70929	2.98	2.3978	2.54102	2.46
P40925	Malate dehydrogenase, cytoplasmic OS=Homo sapiens OX=9606 GN=MDH1 PE=1 SV=4	2.76977	3.12763	2.94	2.17951	2.75061	2.46
O95671	Probable bifunctional dTTP/UTP pyrophosphatase/methyltransferase protein OS=Homo sapiens OX=9606 GN=ASMTL PE=1 SV=3	2.82782	2.84599	2.83	2.46989	2.45943	2.46
P30085	UMP-CMP kinase OS=Homo sapiens OX=9606 GN=CMPK1 PE=1 SV=3	2.96901	2.69599	2.83	2.24184	2.68032	2.46
Q9BQE3	Tubulin alpha-1C chain OS=Homo sapiens OX=9606 GN=TUBA1C PE=1 SV=1	2.75489	2.79077	2.77	2.25399	2.66903	2.46
P55060	Exportin-2 OS=Homo sapiens OX=9606 GN=CSE1L PE=1 SV=3	2.98003	2.9222	2.95	2.33628	2.57289	2.45
Q9UBM7	7-dehydrocholesterol reductase OS=Homo sapiens OX=9606 GN=DHCR7 PE=1 SV=1	2.9241	2.91648	2.92	2.45418	2.46467	2.45	√	√
P10809	60 kDa heat shock protein, mitochondrial OS=Homo sapiens OX=9606 GN=HSPD1 PE=1 SV=2	2.67807	2.82579	2.75	2.19535	2.71809	2.45
P49720	Proteasome subunit beta type-3 OS=Homo sapiens OX=9606 GN=PSMB3 PE=1 SV=2	2.83188	2.83592	2.83	2.22033	2.66903	2.44
Q13162	Peroxiredoxin-4 OS=Homo sapiens OX=9606 GN=PRDX4 PE=1 SV=1	2.61824	3.04614	2.83	1.95977	2.93734	2.44		√
P0DMV9	Heat shock 70 kDa protein 1B OS=Homo sapiens OX=9606 GN=HSPA1B PE=1 SV=1	2.70929	2.9279	2.81	2.15056	2.73118	2.44
P14625	Endoplasmin OS=Homo sapiens OX=9606 GN=HSP90B1 PE=1 SV=1	2.76553	2.79286	2.77	2.30743	2.58976	2.44		√
O75083	WD repeat-containing protein 1 OS=Homo sapiens OX=9606 GN=WDR1 PE=1 SV=4	2.68706	2.81558	2.75	2.20789	2.6893	2.44
P31948	Stress-induced-phosphoprotein 1 OS=Homo sapiens OX=9606 GN=STIP1 PE=1 SV=1	2.80529	2.63923	2.72	2.42761	2.46728	2.44
P04075	Fructose-bisphosphate aldolase A OS=Homo sapiens OX=9606 GN=ALDOA PE=1 SV=2	2.72901	2.51854	2.62	2.35896	2.53605	2.44
O15145	Actin-related protein 2/3 complex subunit 3 OS=Homo sapiens OX=9606 GN=ARPC3 PE=1 SV=3	2.82171	2.88947	2.85	2.33342	2.53854	2.43
P61247	40S ribosomal protein S3a OS=Homo sapiens OX=9606 GN=RPS3A PE=1 SV=2	2.84599	2.80735	2.82	2.37016	2.49057	2.43
O94979	Protein transport protein Sec31A OS=Homo sapiens OX=9606 GN=SEC31A PE=1 SV=3	2.66221	2.73335	2.69	2.36177	2.5008	2.43
Q6PIU2	Neutral cholesterol ester hydrolase 1 OS=Homo sapiens OX=9606 GN=NCEH1 PE=1 SV=3	2.5008	2.50589	2.5	2.46205	2.40871	2.43	√	√
Q969X5	Endoplasmic reticulum-Golgi intermediate compartment protein 1 OS=Homo sapiens OX=9606 GN=ERGIC1 PE=1 SV=1	2.80735	3.25399	3.03	2.28096	2.57773	2.42	√	√
Q04917	14-3-3 protein eta OS=Homo sapiens OX=9606 GN=YWHAH PE=1 SV=4	2.73335	3.1811	2.95	2.09424	2.75061	2.42
Q9HB71	Calcyclin-binding protein OS=Homo sapiens OX=9606 GN=CACYBP PE=1 SV=2	2.85599	2.91265	2.88	1.98185	2.86196	2.42
Q99798	Aconitate hydratase, mitochondrial OS=Homo sapiens OX=9606 GN=ACO2 PE=1 SV=2	3.16992	2.58256	2.87	2.45154	2.40599	2.42
Q9H9B4	Sideroflexin-1 OS=Homo sapiens OX=9606 GN=SFXN1 PE=1 SV=4	2.62994	3.07724	2.85	2.25096	2.59932	2.42	√	√
O43291	Kunitz-type protease inhibitor 2 OS=Homo sapiens OX=9606 GN=SPINT2 PE=1 SV=2	2.04614	2.28983	2.16	2.37295	2.47508	2.42
Q15843	NEDD8 OS=Homo sapiens OX=9606 GN=NEDD8 PE=1 SV=1	2.10098	2.11437	2.1	2.35614	2.49057	2.42
P35998	26S proteasome regulatory subunit 7 OS=Homo sapiens OX=9606 GN=PSMC2 PE=1 SV=3	2.93168	2.90689	2.91	2.21723	2.60407	2.41
O14879	Interferon-induced protein with tetratricopeptide repeats 3 OS=Homo sapiens OX=9606 GN=IFIT3 PE=1 SV=1	2.88166	2.93734	2.9	2.28392	2.5435	2.41
P35606	Coatomer subunit beta' OS=Homo sapiens OX=9606 GN=COPB2 PE=1 SV=2	2.82782	2.86394	2.84	2.26003	2.57531	2.41
P49588	Alanine--tRNA ligase, cytoplasmic OS=Homo sapiens OX=9606 GN=AARS1 PE=1 SV=2	2.70708	2.84197	2.77	2.26303	2.55827	2.41
P13489	Ribonuclease inhibitor OS=Homo sapiens OX=9606 GN=RNH1 PE=1 SV=2	2.35896	2.7845	2.57	2.15381	2.67582	2.41
Q658Y4	Protein FAM91A1 OS=Homo sapiens OX=9606 GN=FAM91A1 PE=1 SV=3	2.65764	2.38405	2.52	2.38128	2.44095	2.41
Q9UJC3	Protein Hook homolog 1 OS=Homo sapiens OX=9606 GN=HOOK1 PE=1 SV=2	2.74201	3.0197	2.88	2.09085	2.71589	2.4
P12081	Histidine--tRNA ligase, cytoplasmic OS=Homo sapiens OX=9606 GN=HARS1 PE=1 SV=2	2.73769	2.89918	2.81	2.01078	2.80323	2.4
Q8NF37	Lysophosphatidylcholine acyltransferase 1 OS=Homo sapiens OX=9606 GN=LPCAT1 PE=1 SV=2	3.12928	2.99458	3.06	2.5462	2.24636	2.39	√	√
Q9Y3P9	Rab GTPase-activating protein 1 OS=Homo sapiens OX=9606 GN=RABGAP1 PE=1 SV=3	3.19219	2.89724	3.04	2.31034	2.47249	2.39
Q9HAV4	Exportin-5 OS=Homo sapiens OX=9606 GN=XPO5 PE=1 SV=1	3.0018	2.89336	2.94	2.31325	2.47508	2.39
Q15392	Delta(24)-sterol reductase OS=Homo sapiens OX=9606 GN=DHCR24 PE=1 SV=2	2.86987	2.90111	2.88	2.43029	2.35614	2.39	√	√
P42704	Leucine-rich PPR motif-containing protein, mitochondrial OS=Homo sapiens OX=9606 GN=LRPPRC PE=1 SV=3	2.80116	2.87971	2.84	2.22651	2.5656	2.39		√
P30084	Enoyl-CoA hydratase, mitochondrial OS=Homo sapiens OX=9606 GN=ECHS1 PE=1 SV=4	2.82579	2.78241	2.8	2.36737	2.42223	2.39
Q14258	E3 ubiquitin/ISG15 ligase TRIM25 OS=Homo sapiens OX=9606 GN=TRIM25 PE=1 SV=2	2.69377	2.82985	2.76	2.35896	2.42492	2.39
Q16719	Kynureninase OS=Homo sapiens OX=9606 GN=KYNU PE=1 SV=1	2.70044	2.80529	2.75	2.25399	2.54597	2.39
P17480	Nucleolar transcription factor 1 OS=Homo sapiens OX=9606 GN=UBTF PE=1 SV=1	2.73769	2.74846	2.74	2.35896	2.43029	2.39
B5ME19	Eukaryotic translation initiation factor 3 subunit C-like protein OS=Homo sapiens OX=9606 GN=EIF3CL PE=1 SV=1	2.60881	2.73118	2.66	2.24793	2.54844	2.39
P78344	Eukaryotic translation initiation factor 4 gamma 2 OS=Homo sapiens OX=9606 GN=EIF4G2 PE=1 SV=1	2.64155	2.38128	2.51	2.27202	2.52105	2.39
Q3SXM5	Inactive hydroxysteroid dehydrogenase-like protein 1 OS=Homo sapiens OX=9606 GN=HSDL1 PE=1 SV=3	3.23419	3.18903	3.21	2.44361	2.33628	2.38	√	√
P26640	Valine--tRNA ligase OS=Homo sapiens OX=9606 GN=VARS1 PE=1 SV=4	3.03738	2.8679	2.95	2.21412	2.56316	2.38
Q9NY33	Dipeptidyl peptidase 3 OS=Homo sapiens OX=9606 GN=DPP3 PE=1 SV=2	2.67129	2.86592	2.76	2.08746	2.67356	2.38
O76062	Delta(14)-sterol reductase TM7SF2 OS=Homo sapiens OX=9606 GN=TM7SF2 PE=1 SV=3	2.68706	2.69599	2.69	2.36737	2.3978	2.38
P25788	Proteasome subunit alpha type-3 OS=Homo sapiens OX=9606 GN=PSMA3 PE=1 SV=2	2.46989	2.58496	2.52	2.23266	2.53605	2.38		√
Q13501	Sequestosome-1 OS=Homo sapiens OX=9606 GN=SQSTM1 PE=1 SV=1	2.97085	3.29131	3.13	2.10098	2.65076	2.37
Q96T76	MMS19 nucleotide excision repair protein homolog OS=Homo sapiens OX=9606 GN=MMS19 PE=1 SV=2	2.64386	3.17473	2.9	1.75275	3.0054	2.37
Q99615	DnaJ homolog subfamily C member 7 OS=Homo sapiens OX=9606 GN=DNAJC7 PE=1 SV=2	2.79494	2.98185	2.88	2.26003	2.48027	2.37
Q99460	26S proteasome non-ATPase regulatory subunit 1 OS=Homo sapiens OX=9606 GN=PSMD1 PE=1 SV=2	2.7866	2.73118	2.75	2.26003	2.48027	2.37
Q16181	Septin-7 OS=Homo sapiens OX=9606 GN=SEPTIN7 PE=1 SV=2	2.95233	2.61589	2.78	2.38128	2.34767	2.36
Q6P996	Pyridoxal-dependent decarboxylase domain-containing protein 1 OS=Homo sapiens OX=9606 GN=PDXDC1 PE=1 SV=2	2.78031	2.72901	2.75	2.18269	2.55336	2.36
Q9Y365	START domain-containing protein 10 OS=Homo sapiens OX=9606 GN=STARD10 PE=1 SV=2	2.73769	2.74846	2.74	2.14405	2.57773	2.36
P13639	Elongation factor 2 OS=Homo sapiens OX=9606 GN=EEF2 PE=1 SV=4	2.72683	2.69599	2.71	2.20477	2.51602	2.36
P60174	Triosephosphate isomerase OS=Homo sapiens OX=9606 GN=TPI1 PE=1 SV=4	2.41414	2.62761	2.52	2.02148	2.70266	2.36
Q8N1G4	Leucine-rich repeat-containing protein 47 OS=Homo sapiens OX=9606 GN=LRRC47 PE=1 SV=1	2.52857	2.46728	2.49	2.28983	2.43829	2.36
Q71RC2	La-related protein 4 OS=Homo sapiens OX=9606 GN=LARP4 PE=1 SV=3	4.07553	3.62293	3.84	2.43296	2.28096	2.35		√
Q7Z3C6	Autophagy-related protein 9A OS=Homo sapiens OX=9606 GN=ATG9A PE=1 SV=3	3.07724	3.08576	3.08	2.37016	2.34483	2.35	√	√
P08195	4F2 cell-surface antigen heavy chain OS=Homo sapiens OX=9606 GN=SLC3A2 PE=1 SV=3	2.82171	3.17153	2.99	2.12763	2.57289	2.35
P16422	Epithelial cell adhesion molecule OS=Homo sapiens OX=9606 GN=EPCAM PE=1 SV=2	2.53854	3.32912	2.93	1.848	2.86987	2.35
O75533	Splicing factor 3B subunit 1 OS=Homo sapiens OX=9606 GN=SF3B1 PE=1 SV=3	2.88362	2.91073	2.89	2.21412	2.49057	2.35
P55786	Puromycin-sensitive aminopeptidase OS=Homo sapiens OX=9606 GN=NPEPPS PE=1 SV=2	2.9222	2.87184	2.89	2.17632	2.53605	2.35
P23396	40S ribosomal protein S3 OS=Homo sapiens OX=9606 GN=RPS3 PE=1 SV=2	2.62527	2.89918	2.76	2.15056	2.5656	2.35
P53992	Protein transport protein Sec24C OS=Homo sapiens OX=9606 GN=SEC24C PE=1 SV=3	2.61353	2.63459	2.62	2.36737	2.34483	2.35
P34897	Serine hydroxymethyltransferase, mitochondrial OS=Homo sapiens OX=9606 GN=SHMT2 PE=1 SV=3	2.46205	2.53605	2.49	2.31325	2.40327	2.35
Q9BXJ9	N-alpha-acetyltransferase 15, NatA auxiliary subunit OS=Homo sapiens OX=9606 GN=NAA15 PE=1 SV=1	2.82782	2.91265	2.87	2.06005	2.62059	2.34
P26641	Elongation factor 1-gamma OS=Homo sapiens OX=9606 GN=EEF1G PE=1 SV=3	2.774	2.75702	2.76	2.20789	2.488	2.34
Q8NFA0	Ubiquitin carboxyl-terminal hydrolase 32 OS=Homo sapiens OX=9606 GN=USP32 PE=1 SV=1	2.68032	2.77821	2.72	2.18269	2.50843	2.34
Q6UXG2	Endosome/lysosome-associated apoptosis and autophagy regulator 1 OS=Homo sapiens OX=9606 GN=ELAPOR1 PE=1 SV=2	2.57289	2.88362	2.72	2.1177	2.57046	2.34
O60664	Perilipin-3 OS=Homo sapiens OX=9606 GN=PLIN3 PE=1 SV=3	2.35896	2.8953	2.62	2.22342	2.46205	2.34	√
P00505	Aspartate aminotransferase, mitochondrial OS=Homo sapiens OX=9606 GN=GOT2 PE=1 SV=3	2.36457	2.62761	2.49	2.11437	2.58015	2.34
Q16851	UTP--glucose-1-phosphate uridylyltransferase OS=Homo sapiens OX=9606 GN=UGP2 PE=1 SV=5	3.10769	2.96532	3.03	2.11437	2.55336	2.33
P20591	Interferon-induced GTP-binding protein Mx1 OS=Homo sapiens OX=9606 GN=MX1 PE=1 SV=4	2.74846	2.82579	2.78	2.16992	2.4957	2.33
P14324	Farnesyl pyrophosphate synthase OS=Homo sapiens OX=9606 GN=FDPS PE=1 SV=4	2.488	2.91839	2.7	1.99639	2.66676	2.33
P48643	T-complex protein 1 subunit epsilon OS=Homo sapiens OX=9606 GN=CCT5 PE=1 SV=1	2.51602	2.85599	2.68	2.04614	2.62527	2.33
P35579	Myosin-9 OS=Homo sapiens OX=9606 GN=MYH9 PE=1 SV=4	2.66903	2.62527	2.64	2.18269	2.49057	2.33
Q99442	Translocation protein SEC62 OS=Homo sapiens OX=9606 GN=SEC62 PE=1 SV=1	3.01792	3.46205	3.23	2.07039	2.57289	2.32	√	√
Q9BWF3	RNA-binding protein 4 OS=Homo sapiens OX=9606 GN=RBM4 PE=1 SV=1	2.95977	3.21878	3.08	2.05658	2.58976	2.32
P07099	Epoxide hydrolase 1 OS=Homo sapiens OX=9606 GN=EPHX1 PE=1 SV=1	2.99458	2.95791	2.97	2.27501	2.37295	2.32	√	√
O43592	Exportin-T OS=Homo sapiens OX=9606 GN=XPOT PE=1 SV=2	2.74201	3.09085	2.91	1.95606	2.69599	2.32
Q02790	Peptidyl-prolyl cis-trans isomerase FKBP4 OS=Homo sapiens OX=9606 GN=FKBP4 PE=1 SV=3	2.82171	2.80529	2.81	2.09424	2.55336	2.32
Q16531	DNA damage-binding protein 1 OS=Homo sapiens OX=9606 GN=DDB1 PE=1 SV=1	2.69377	2.9241	2.8	2.19849	2.45418	2.32
P26599	Polypyrimidine tract-binding protein 1 OS=Homo sapiens OX=9606 GN=PTBP1 PE=1 SV=1	2.41414	3.19849	2.8	1.91839	2.73335	2.32
O00571	ATP-dependent RNA helicase DDX3X OS=Homo sapiens OX=9606 GN=DDX3X PE=1 SV=3	2.48285	2.91456	2.69	2.06005	2.58737	2.32
Q5K4L6	Solute carrier family 27 member 3 OS=Homo sapiens OX=9606 GN=SLC27A3 PE=1 SV=4	3.14568	3.13914	3.14	2.31615	2.31034	2.31	√
P60660	Myosin light polypeptide 6 OS=Homo sapiens OX=9606 GN=MYL6 PE=1 SV=2	3.11437	2.98732	3.05	2.54102	2.08746	2.31
P31943	Heterogeneous nuclear ribonucleoprotein H OS=Homo sapiens OX=9606 GN=HNRNPH1 PE=1 SV=4	2.84599	2.98732	2.91	2.29572	2.33628	2.31		√
Q16822	Phosphoenolpyruvate carboxykinase [GTP], mitochondrial OS=Homo sapiens OX=9606 GN=PCK2 PE=1 SV=4	2.78869	2.65306	2.72	2.18269	2.44626	2.31
P55072	Transitional endoplasmic reticulum ATPase OS=Homo sapiens OX=9606 GN=VCP PE=1 SV=4	2.64155	2.72247	2.68	2.14405	2.4957	2.31
P17844	Probable ATP-dependent RNA helicase DDX5 OS=Homo sapiens OX=9606 GN=DDX5 PE=1 SV=1	2.91265	2.38957	2.65	2.29866	2.32769	2.31
Q00610	Clathrin heavy chain 1 OS=Homo sapiens OX=9606 GN=CLTC PE=1 SV=5	2.59694	2.70044	2.64	2.1177	2.50589	2.31
P23528	Cofilin-1 OS=Homo sapiens OX=9606 GN=CFL1 PE=1 SV=3	2.41954	2.38957	2.4	2.08406	2.5435	2.31
P43246	DNA mismatch repair protein Msh2 OS=Homo sapiens OX=9606 GN=MSH2 PE=1 SV=1	2.75916	2.88166	2.82	1.89918	2.70929	2.3
Q01813	ATP-dependent 6-phosphofructokinase, platelet type OS=Homo sapiens OX=9606 GN=PFKP PE=1 SV=2	2.72247	2.89336	2.8	2.19849	2.40327	2.3
Q9BZF1	Oxysterol-binding protein-related protein 8 OS=Homo sapiens OX=9606 GN=OSBPL8 PE=1 SV=3	2.81352	2.73335	2.77	2.30159	2.30159	2.3	√	√
P52209	6-phosphogluconate dehydrogenase, decarboxylating OS=Homo sapiens OX=9606 GN=PGD PE=1 SV=3	2.67807	2.85	2.76	2.17632	2.44095	2.3
Q92616	eIF-2-alpha kinase activator GCN1 OS=Homo sapiens OX=9606 GN=GCN1 PE=1 SV=6	2.69377	2.80735	2.75	2.10098	2.51854	2.3
O43847	Nardilysin OS=Homo sapiens OX=9606 GN=NRDC PE=1 SV=3	2.77821	2.58256	2.68	1.98914	2.62761	2.3
O95292	Vesicle-associated membrane protein-associated protein B/C OS=Homo sapiens OX=9606 GN=VAPB PE=1 SV=3	2.73118	2.49057	2.61	2.08406	2.53107	2.3	√	√
P12268	Inosine-5'-monophosphate dehydrogenase 2 OS=Homo sapiens OX=9606 GN=IMPDH2 PE=1 SV=2	2.64155	2.57289	2.6	2.31615	2.29866	2.3
P60866	40S ribosomal protein S20 OS=Homo sapiens OX=9606 GN=RPS20 PE=1 SV=1	2.25399	2.30743	2.28	2.12763	2.48285	2.3
Q92538	Golgi-specific brefeldin A-resistance guanine nucleotide exchange factor 1 OS=Homo sapiens OX=9606 GN=GBF1 PE=1 SV=2	3.01436	2.69822	2.85	2.34767	2.23266	2.29
O43175	D-3-phosphoglycerate dehydrogenase OS=Homo sapiens OX=9606 GN=PHGDH PE=1 SV=4	2.58976	3.03738	2.81	2.03562	2.56316	2.29
Q99832	T-complex protein 1 subunit eta OS=Homo sapiens OX=9606 GN=CCT7 PE=1 SV=2	2.64616	2.70487	2.67	2.08406	2.51349	2.29
P21266	Glutathione S-transferase Mu 3 OS=Homo sapiens OX=9606 GN=GSTM3 PE=1 SV=3	2.53854	2.74201	2.64	1.98914	2.59216	2.29
P18206	Vinculin OS=Homo sapiens OX=9606 GN=VCL PE=1 SV=4	2.48285	2.7845	2.63	2.03914	2.5509	2.29
Q06210	Glutamine--fructose-6-phosphate aminotransferase [isomerizing] 1 OS=Homo sapiens OX=9606 GN=GFPT1 PE=1 SV=3	2.53605	2.67356	2.6	2.05311	2.5435	2.29
P61221	ATP-binding cassette sub-family E member 1 OS=Homo sapiens OX=9606 GN=ABCE1 PE=1 SV=1	2.93923	2.86196	2.9	2.16992	2.39232	2.28
P09972	Fructose-bisphosphate aldolase C OS=Homo sapiens OX=9606 GN=ALDOC PE=1 SV=2	2.74416	2.86987	2.8	2.06005	2.51854	2.28
Q9UHB9	Signal recognition particle subunit SRP68 OS=Homo sapiens OX=9606 GN=SRP68 PE=1 SV=2	2.81352	2.79286	2.8	2.28096	2.28392	2.28
Q9H269	Vacuolar protein sorting-associated protein 16 homolog OS=Homo sapiens OX=9606 GN=VPS16 PE=1 SV=2	2.9279	2.65764	2.79	2.32481	2.24793	2.28
Q9UJ70	N-acetyl-D-glucosamine kinase OS=Homo sapiens OX=9606 GN=NAGK PE=1 SV=4	2.68032	2.77821	2.72	2.07724	2.49825	2.28
Q5VYK3	Proteasome adapter and scaffold protein ECM29 OS=Homo sapiens OX=9606 GN=ECPAS PE=1 SV=2	2.48543	2.91265	2.69	2.02503	2.5435	2.28		√
P11021	Endoplasmic reticulum chaperone BiP OS=Homo sapiens OX=9606 GN=HSPA5 PE=1 SV=2	2.72683	2.64155	2.68	2.22959	2.33342	2.28		√
Q92900	Regulator of nonsense transcripts 1 OS=Homo sapiens OX=9606 GN=UPF1 PE=1 SV=2	2.58496	2.76553	2.67	2.1177	2.45418	2.28
O95782	AP-2 complex subunit alpha-1 OS=Homo sapiens OX=9606 GN=AP2A1 PE=1 SV=3	2.61824	2.59455	2.6	2.18269	2.38128	2.28
P38646	Stress-70 protein, mitochondrial OS=Homo sapiens OX=9606 GN=HSPA9 PE=1 SV=2	2.59455	2.60881	2.6	2.04264	2.52607	2.28
P0DN79	Cystathionine beta-synthase-like protein OS=Homo sapiens OX=9606 GN=CBSL PE=1 SV=1	2.55827	2.57531	2.56	2.15381	2.40871	2.28
Q13185	Chromobox protein homolog 3 OS=Homo sapiens OX=9606 GN=CBX3 PE=1 SV=4	2.37295	2.69153	2.53	1.848	2.72028	2.28
P60709	Actin, cytoplasmic 1 OS=Homo sapiens OX=9606 GN=ACTB PE=1 SV=1	2.52105	2.51096	2.51	2.03914	2.52356	2.28
Q96N66	Lysophospholipid acyltransferase 7 OS=Homo sapiens OX=9606 GN=MBOAT7 PE=1 SV=2	2.19219	2.38681	2.28	2.22959	2.33914	2.28	√	√
P04798	Cytochrome P450 1A1 OS=Homo sapiens OX=9606 GN=CYP1A1 PE=1 SV=1	1.93734	2.42492	2.18	2.09085	2.48285	2.28
Q9UNM6	26S proteasome non-ATPase regulatory subunit 13 OS=Homo sapiens OX=9606 GN=PSMD13 PE=1 SV=2	2.848	2.86987	2.85	2.02857	2.52857	2.27
P52597	Heterogeneous nuclear ribonucleoprotein F OS=Homo sapiens OX=9606 GN=HNRNPF PE=1 SV=3	2.78241	2.65076	2.71	2.11103	2.4489	2.27		√
P05023	Sodium/potassium-transporting ATPase subunit alpha-1 OS=Homo sapiens OX=9606 GN=ATP1A1 PE=1 SV=1	2.75702	2.65535	2.7	2.28392	2.25701	2.27	√	√
P53621	Coatomer subunit alpha OS=Homo sapiens OX=9606 GN=COPA PE=1 SV=2	2.54844	2.75275	2.65	2.10434	2.44361	2.27
O15355	Protein phosphatase 1G OS=Homo sapiens OX=9606 GN=PPM1G PE=1 SV=1	2.53605	2.66221	2.59	2.11103	2.44095	2.27
P09914	Interferon-induced protein with tetratricopeptide repeats 1 OS=Homo sapiens OX=9606 GN=IFIT1 PE=1 SV=2	2.53356	2.49057	2.51	2.20477	2.34767	2.27
Q8N2K0	Lysophosphatidylserine lipase ABHD12 OS=Homo sapiens OX=9606 GN=ABHD12 PE=1 SV=2	2.23573	2.23573	2.23	2.25399	2.28688	2.27	√	√
P50851	Lipopolysaccharide-responsive and beige-like anchor protein OS=Homo sapiens OX=9606 GN=LRBA PE=1 SV=4	2.72247	3.16992	2.94	2.06005	2.47508	2.26
P49748	Very long-chain specific acyl-CoA dehydrogenase, mitochondrial OS=Homo sapiens OX=9606 GN=ACADVL PE=1 SV=1	2.80529	2.7866	2.79	2.26003	2.26903	2.26
P47756	F-actin-capping protein subunit beta OS=Homo sapiens OX=9606 GN=CAPZB PE=1 SV=4	2.76553	2.81352	2.78	2.01078	2.51349	2.26
Q13347	Eukaryotic translation initiation factor 3 subunit I OS=Homo sapiens OX=9606 GN=EIF3I PE=1 SV=1	2.78869	2.68257	2.73	2.06005	2.46467	2.26
Q9Y4L1	Hypoxia up-regulated protein 1 OS=Homo sapiens OX=9606 GN=HYOU1 PE=1 SV=1	2.51854	2.70708	2.61	2.17951	2.34483	2.26		√
P27708	CAD protein OS=Homo sapiens OX=9606 GN=CAD PE=1 SV=3	2.50843	2.70487	2.6	2.05658	2.47508	2.26
Q6NXG1	Epithelial splicing regulatory protein 1 OS=Homo sapiens OX=9606 GN=ESRP1 PE=1 SV=2	2.46989	2.70044	2.58	2.14078	2.39232	2.26
Q86VP6	Cullin-associated NEDD8-dissociated protein 1 OS=Homo sapiens OX=9606 GN=CAND1 PE=1 SV=2	2.56071	2.58976	2.57	2.04614	2.488	2.26
O00232	26S proteasome non-ATPase regulatory subunit 12 OS=Homo sapiens OX=9606 GN=PSMD12 PE=1 SV=3	2.43296	2.70266	2.56	2.0635	2.46728	2.26
P23526	Adenosylhomocysteinase OS=Homo sapiens OX=9606 GN=AHCY PE=1 SV=4	2.41954	2.58256	2.5	1.99639	2.52607	2.26
P68104	Elongation factor 1-alpha 1 OS=Homo sapiens OX=9606 GN=EEF1A1 PE=1 SV=1	2.33056	2.38681	2.35	2.31904	2.21101	2.26
P14618	Pyruvate kinase PKM OS=Homo sapiens OX=9606 GN=PKM PE=1 SV=4	2.71809	2.80323	2.76	2.0635	2.45154	2.25
P10155	60 kDa SS-A/Ro ribonucleoprotein OS=Homo sapiens OX=9606 GN=RO60 PE=1 SV=2	3.06178	2.44626	2.75	2.22342	2.28392	2.25
Q13572	Inositol-tetrakisphosphate 1-kinase OS=Homo sapiens OX=9606 GN=ITPK1 PE=1 SV=2	2.76553	2.64155	2.7	2.16027	2.34483	2.25
Q5JRX3	Presequence protease, mitochondrial OS=Homo sapiens OX=9606 GN=PITRM1 PE=1 SV=3	2.69822	2.66676	2.68	2.14078	2.36737	2.25		√
Q05639	Elongation factor 1-alpha 2 OS=Homo sapiens OX=9606 GN=EEF1A2 PE=1 SV=1	2.56316	2.59694	2.58	2.17951	2.33342	2.25
Q92499	ATP-dependent RNA helicase DDX1 OS=Homo sapiens OX=9606 GN=DDX1 PE=1 SV=2	2.3978	2.64155	2.51	2.08746	2.41954	2.25
Q9Y295	Developmentally-regulated GTP-binding protein 1 OS=Homo sapiens OX=9606 GN=DRG1 PE=1 SV=1	2.34767	2.48543	2.41	1.95977	2.55336	2.25
A0MZ66	Shootin-1 OS=Homo sapiens OX=9606 GN=SHTN1 PE=1 SV=4	3.08066	3.11103	3.09	2.16027	2.32481	2.24
P12236	ADP/ATP translocase 3 OS=Homo sapiens OX=9606 GN=SLC25A6 PE=1 SV=4	2.96901	2.92979	2.94	2.23573	2.24489	2.24	√	√
P53618	Coatomer subunit beta OS=Homo sapiens OX=9606 GN=COPB1 PE=1 SV=3	2.76977	2.82985	2.79	1.91456	2.56803	2.24
P36776	Lon protease homolog, mitochondrial OS=Homo sapiens OX=9606 GN=LONP1 PE=1 SV=2	2.84197	2.67129	2.75	2.04963	2.44626	2.24
Q92696	Geranylgeranyl transferase type-2 subunit alpha OS=Homo sapiens OX=9606 GN=RABGGTA PE=1 SV=2	2.87184	2.63227	2.75	1.91839	2.57773	2.24
Q92598	Heat shock protein 105 kDa OS=Homo sapiens OX=9606 GN=HSPH1 PE=1 SV=1	2.44095	3.00899	2.72	1.89142	2.6017	2.24
O14980	Exportin-1 OS=Homo sapiens OX=9606 GN=XPO1 PE=1 SV=1	2.72901	2.68257	2.7	2.12763	2.35896	2.24
P29401	Transketolase OS=Homo sapiens OX=9606 GN=TKT PE=1 SV=3	2.56803	2.78241	2.67	1.89142	2.58976	2.24
P50395	Rab GDP dissociation inhibitor beta OS=Homo sapiens OX=9606 GN=GDI2 PE=1 SV=2	2.61589	2.70487	2.66	2.06005	2.43029	2.24
O75874	Isocitrate dehydrogenase [NADP] cytoplasmic OS=Homo sapiens OX=9606 GN=IDH1 PE=1 SV=2	2.58256	2.63459	2.6	1.95233	2.53356	2.24
Q9Y4E8	Ubiquitin carboxyl-terminal hydrolase 15 OS=Homo sapiens OX=9606 GN=USP15 PE=1 SV=3	2.5509	2.56071	2.55	2.02857	2.46467	2.24
O14745	Na(+)/H(+) exchange regulatory cofactor NHE-RF1 OS=Homo sapiens OX=9606 GN=SLC9A3R1 PE=1 SV=4	2.42761	2.42223	2.42	2.05311	2.42761	2.24
Q6P2Q9	Pre-mRNA-processing-splicing factor 8 OS=Homo sapiens OX=9606 GN=PRPF8 PE=1 SV=2	2.90881	2.75916	2.83	2.17313	2.28983	2.23
P24534	Elongation factor 1-beta OS=Homo sapiens OX=9606 GN=EEF1B2 PE=1 SV=3	2.67356	2.97085	2.82	2.14405	2.32769	2.23
Q15084	Protein disulfide-isomerase A6 OS=Homo sapiens OX=9606 GN=PDIA6 PE=1 SV=1	2.62059	2.64155	2.63	2.14731	2.33056	2.23
Q9NQR4	Omega-amidase NIT2 OS=Homo sapiens OX=9606 GN=NIT2 PE=1 SV=1	2.57773	2.67807	2.62	2.09761	2.37295	2.23
P00558	Phosphoglycerate kinase 1 OS=Homo sapiens OX=9606 GN=PGK1 PE=1 SV=3	2.66448	2.58737	2.62	2.09085	2.38681	2.23
P13010	X-ray repair cross-complementing protein 5 OS=Homo sapiens OX=9606 GN=XRCC5 PE=1 SV=3	2.51854	2.69377	2.6	2.0036	2.47249	2.23
Q8WUM4	Programmed cell death 6-interacting protein OS=Homo sapiens OX=9606 GN=PDCD6IP PE=1 SV=1	2.54597	2.57046	2.55	2.0635	2.40599	2.23
Q00978	Interferon regulatory factor 9 OS=Homo sapiens OX=9606 GN=IRF9 PE=1 SV=1	2.65535	2.4489	2.55	2.20477	2.26903	2.23
Q92945	Far upstream element-binding protein 2 OS=Homo sapiens OX=9606 GN=KHSRP PE=1 SV=4	2.50335	2.55827	2.53	2.18903	2.28983	2.23		√
Q96JB2	Conserved oligomeric Golgi complex subunit 3 OS=Homo sapiens OX=9606 GN=COG3 PE=1 SV=3	2.10098	2.9241	2.51	1.82782	2.64155	2.23
P49915	GMP synthase [glutamine-hydrolyzing] OS=Homo sapiens OX=9606 GN=GMPS PE=1 SV=1	2.60881	3.04089	2.82	2.06005	2.39232	2.22
Q14139	Ubiquitin conjugation factor E4 A OS=Homo sapiens OX=9606 GN=UBE4A PE=1 SV=2	2.60644	2.81352	2.7	2.04963	2.40871	2.22
Q9UM54	Unconventional myosin-VI OS=Homo sapiens OX=9606 GN=MYO6 PE=1 SV=4	2.57046	2.84599	2.7	1.98185	2.45943	2.22
Q13045	Protein flightless-1 homolog OS=Homo sapiens OX=9606 GN=FLII PE=1 SV=2	2.73335	2.64386	2.68	2.11103	2.34483	2.22
Q7L1Q6	Basic leucine zipper and W2 domain-containing protein 1 OS=Homo sapiens OX=9606 GN=BZW1 PE=1 SV=1	2.58737	2.75702	2.67	2.19219	2.26604	2.22
O43795	Unconventional myosin-Ib OS=Homo sapiens OX=9606 GN=MYO1B PE=1 SV=3	2.58976	2.72247	2.65	2.17951	2.26903	2.22
Q12906	Interleukin enhancer-binding factor 3 OS=Homo sapiens OX=9606 GN=ILF3 PE=1 SV=3	2.43829	2.70708	2.57	1.96347	2.48285	2.22
Q93009	Ubiquitin carboxyl-terminal hydrolase 7 OS=Homo sapiens OX=9606 GN=USP7 PE=1 SV=2	2.62994	2.38128	2.5	2.07382	2.37573	2.22
P35270	Sepiapterin reductase OS=Homo sapiens OX=9606 GN=SPR PE=1 SV=1	2.35332	2.62527	2.48	1.87971	2.5656	2.22
P61981	14-3-3 protein gamma OS=Homo sapiens OX=9606 GN=YWHAG PE=1 SV=2	2.42223	2.37016	2.39	2.29572	2.15381	2.22
P23443	Ribosomal protein S6 kinase beta-1 OS=Homo sapiens OX=9606 GN=RPS6KB1 PE=1 SV=2	2.45154	2.31615	2.38	2.04614	2.40054	2.22
Q9NZM1	Myoferlin OS=Homo sapiens OX=9606 GN=MYOF PE=1 SV=1	2.66903	2.75702	2.71	2.06695	2.36737	2.21
Q9UMS4	Pre-mRNA-processing factor 19 OS=Homo sapiens OX=9606 GN=PRPF19 PE=1 SV=1	2.60644	2.76341	2.68	1.9782	2.4489	2.21
P62191	26S proteasome regulatory subunit 4 OS=Homo sapiens OX=9606 GN=PSMC1 PE=1 SV=1	2.47249	2.8679	2.67	1.74416	2.68032	2.21
Q99996	A-kinase anchor protein 9 OS=Homo sapiens OX=9606 GN=AKAP9 PE=1 SV=4	2.46989	2.36737	2.41	2.01078	2.42223	2.21
P07355	Annexin A2 OS=Homo sapiens OX=9606 GN=ANXA2 PE=1 SV=2	2.42223	2.34483	2.38	2.20477	2.23266	2.21
P08133	Annexin A6 OS=Homo sapiens OX=9606 GN=ANXA6 PE=1 SV=3	2.58496	2.65764	2.62	2.07382	2.33914	2.2
Q14C86	GTPase-activating protein and VPS9 domain-containing protein 1 OS=Homo sapiens OX=9606 GN=GAPVD1 PE=1 SV=2	2.59455	2.64386	2.61	2.1635	2.24489	2.2
Q9Y265	RuvB-like 1 OS=Homo sapiens OX=9606 GN=RUVBL1 PE=1 SV=1	2.55582	2.5656	2.56	2.0321	2.37016	2.2
Q14152	Eukaryotic translation initiation factor 3 subunit A OS=Homo sapiens OX=9606 GN=EIF3A PE=1 SV=1	2.37573	2.69822	2.53	2.02503	2.38128	2.2
P46940	Ras GTPase-activating-like protein IQGAP1 OS=Homo sapiens OX=9606 GN=IQGAP1 PE=1 SV=1	2.45154	2.59932	2.52	2.02857	2.38957	2.2
P11413	Glucose-6-phosphate 1-dehydrogenase OS=Homo sapiens OX=9606 GN=G6PD PE=1 SV=4	2.53356	2.49825	2.51	2.0635	2.34767	2.2
P06733	Alpha-enolase OS=Homo sapiens OX=9606 GN=ENO1 PE=1 SV=2	2.39232	2.57531	2.48	1.9855	2.42492	2.2
P05556	Integrin beta-1 OS=Homo sapiens OX=9606 GN=ITGB1 PE=1 SV=2	2.48543	2.44361	2.46	2.20477	2.19535	2.2		√
P54577	Tyrosine--tRNA ligase, cytoplasmic OS=Homo sapiens OX=9606 GN=YARS1 PE=1 SV=4	2.47768	2.42761	2.45	2.01436	2.39232	2.2
P23284	Peptidyl-prolyl cis-trans isomerase B OS=Homo sapiens OX=9606 GN=PPIB PE=1 SV=2	1.99277	2.71149	2.35	1.75702	2.65306	2.2
P41091	Eukaryotic translation initiation factor 2 subunit 3 OS=Homo sapiens OX=9606 GN=EIF2S3 PE=1 SV=3	2.26003	2.37851	2.31	2.02503	2.38405	2.2
Q04637	Eukaryotic translation initiation factor 4 gamma 1 OS=Homo sapiens OX=9606 GN=EIF4G1 PE=1 SV=4	2.63227	1.82782	2.23	2.39232	2.02148	2.2
P04181	Ornithine aminotransferase, mitochondrial OS=Homo sapiens OX=9606 GN=OAT PE=1 SV=1	2.64386	3.10266	2.87	1.98185	2.41684	2.19
P17980	26S proteasome regulatory subunit 6A OS=Homo sapiens OX=9606 GN=PSMC3 PE=1 SV=3	2.49057	3.02148	2.75	1.95606	2.42492	2.19
Q9ULT8	E3 ubiquitin-protein ligase HECTD1 OS=Homo sapiens OX=9606 GN=HECTD1 PE=1 SV=3	2.488	2.86592	2.67	1.79077	2.59455	2.19
Q9Y6D6	Brefeldin A-inhibited guanine nucleotide-exchange protein 1 OS=Homo sapiens OX=9606 GN=ARFGEF1 PE=1 SV=2	2.50843	2.78869	2.64	1.99277	2.40054	2.19
O60763	General vesicular transport factor p115 OS=Homo sapiens OX=9606 GN=USO1 PE=1 SV=2	2.53107	2.70708	2.61	1.99277	2.39232	2.19
O15118	NPC intracellular cholesterol transporter 1 OS=Homo sapiens OX=9606 GN=NPC1 PE=1 SV=2	2.61824	2.51349	2.56	2.21101	2.17632	2.19	√	√
O15371	Eukaryotic translation initiation factor 3 subunit D OS=Homo sapiens OX=9606 GN=EIF3D PE=1 SV=1	2.28983	2.80941	2.54	1.99639	2.39506	2.19
P50213	Isocitrate dehydrogenase [NAD] subunit alpha, mitochondrial OS=Homo sapiens OX=9606 GN=IDH3A PE=1 SV=1	2.56316	2.51602	2.53	1.9782	2.41684	2.19
P22102	Trifunctional purine biosynthetic protein adenosine-3 OS=Homo sapiens OX=9606 GN=GART PE=1 SV=1	2.49057	2.51854	2.5	2.02503	2.37016	2.19
Q96ED9	Protein Hook homolog 2 OS=Homo sapiens OX=9606 GN=HOOK2 PE=1 SV=3	2.51602	2.48285	2.49	2.15381	2.24184	2.19
O00487	26S proteasome non-ATPase regulatory subunit 14 OS=Homo sapiens OX=9606 GN=PSMD14 PE=1 SV=1	2.32769	2.39232	2.36	2.15704	2.23266	2.19
O60610	Protein diaphanous homolog 1 OS=Homo sapiens OX=9606 GN=DIAPH1 PE=1 SV=2	2.66448	2.7866	2.72	1.85997	2.51096	2.18
P28838	Cytosol aminopeptidase OS=Homo sapiens OX=9606 GN=LAP3 PE=1 SV=3	2.52607	2.84599	2.68	1.97085	2.39506	2.18
P08243	Asparagine synthetase [glutamine-hydrolyzing] OS=Homo sapiens OX=9606 GN=ASNS PE=1 SV=4	2.31034	2.88557	2.59	1.80323	2.56803	2.18
O00299	Chloride intracellular channel protein 1 OS=Homo sapiens OX=9606 GN=CLIC1 PE=1 SV=4	2.80941	2.32193	2.56	2.20163	2.17632	2.18
Q7Z6Z7	E3 ubiquitin-protein ligase HUWE1 OS=Homo sapiens OX=9606 GN=HUWE1 PE=1 SV=3	2.56803	2.55336	2.56	2.12763	2.25096	2.18
P21333	Filamin-A OS=Homo sapiens OX=9606 GN=FLNA PE=1 SV=4	2.41414	2.40871	2.41	2.06695	2.31034	2.18
Q08380	Galectin-3-binding protein OS=Homo sapiens OX=9606 GN=LGALS3BP PE=1 SV=1	2.56071	1.74416	2.15	2.24489	2.12102	2.18		√
P52292	Importin subunit alpha-1 OS=Homo sapiens OX=9606 GN=KPNA2 PE=1 SV=1	2.46728	3.04089	2.75	1.76129	2.59694	2.17
Q07812	Apoptosis regulator BAX OS=Homo sapiens OX=9606 GN=BAX PE=1 SV=1	2.70708	2.67582	2.69	1.98914	2.36457	2.17
P08754	Guanine nucleotide-binding protein G(i) subunit alpha-3 OS=Homo sapiens OX=9606 GN=GNAI3 PE=1 SV=3	2.59455	2.77821	2.68	2.05658	2.28392	2.17
O43707	Alpha-actinin-4 OS=Homo sapiens OX=9606 GN=ACTN4 PE=1 SV=2	2.488	2.56071	2.52	1.9855	2.36457	2.17		√
Q13155	Aminoacyl tRNA synthase complex-interacting multifunctional protein 2 OS=Homo sapiens OX=9606 GN=AIMP2 PE=1 SV=2	2.62527	2.39232	2.5	2.0036	2.3505	2.17
P48735	Isocitrate dehydrogenase [NADP], mitochondrial OS=Homo sapiens OX=9606 GN=IDH2 PE=1 SV=2	2.44095	2.55336	2.49	1.94111	2.40327	2.17		√
Q93008	Probable ubiquitin carboxyl-terminal hydrolase FAF-X OS=Homo sapiens OX=9606 GN=USP9X PE=1 SV=4	2.33342	2.5435	2.43	1.8953	2.45418	2.17
Q9UMX0	Ubiquilin-1 OS=Homo sapiens OX=9606 GN=UBQLN1 PE=1 SV=2	2.41954	2.4489	2.43	2.18587	2.16027	2.17
P07814	Bifunctional glutamate/proline--tRNA ligase OS=Homo sapiens OX=9606 GN=EPRS1 PE=1 SV=5	2.53107	2.32481	2.42	2.01078	2.33914	2.17
Q9Y490	Talin-1 OS=Homo sapiens OX=9606 GN=TLN1 PE=1 SV=3	2.29572	2.52105	2.4	1.926	2.41954	2.17
Q08345	Epithelial discoidin domain-containing receptor 1 OS=Homo sapiens OX=9606 GN=DDR1 PE=1 SV=1	2.10769	2.55336	2.33	1.93734	2.40327	2.17
P60900	Proteasome subunit alpha type-6 OS=Homo sapiens OX=9606 GN=PSMA6 PE=1 SV=1	2.02148	2.51096	2.26	1.91073	2.44626	2.17		√
O00264	Membrane-associated progesterone receptor component 1 OS=Homo sapiens OX=9606 GN=PGRMC1 PE=1 SV=3	2.9782	2.91073	2.94	2.25096	2.08066	2.16	√	√
Q9H9P8	L-2-hydroxyglutarate dehydrogenase, mitochondrial OS=Homo sapiens OX=9606 GN=L2HGDH PE=1 SV=3	2.71149	2.95791	2.83	2.21412	2.11103	2.16		√
O76024	Wolframin OS=Homo sapiens OX=9606 GN=WFS1 PE=1 SV=2	2.61589	3.0268	2.82	1.88362	2.43829	2.16	√	√
P12814	Alpha-actinin-1 OS=Homo sapiens OX=9606 GN=ACTN1 PE=1 SV=2	2.57531	2.76977	2.67	2.01078	2.32481	2.16		√
P27361	Mitogen-activated protein kinase 3 OS=Homo sapiens OX=9606 GN=MAPK3 PE=1 SV=4	2.57773	2.72683	2.65	2.09424	2.23266	2.16
Q00839	Heterogeneous nuclear ribonucleoprotein U OS=Homo sapiens OX=9606 GN=HNRNPU PE=1 SV=6	2.59455	2.6893	2.64	2.1375	2.18587	2.16
Q9P0L0	Vesicle-associated membrane protein-associated protein A OS=Homo sapiens OX=9606 GN=VAPA PE=1 SV=3	2.55336	2.72901	2.64	1.91839	2.41414	2.16	√
P61011	Signal recognition particle 54 kDa protein OS=Homo sapiens OX=9606 GN=SRP54 PE=1 SV=1	2.46467	2.70929	2.58	1.9782	2.36177	2.16
A0AVT1	Ubiquitin-like modifier-activating enzyme 6 OS=Homo sapiens OX=9606 GN=UBA6 PE=1 SV=1	2.4489	2.63691	2.54	2.02148	2.31034	2.16
Q9Y678	Coatomer subunit gamma-1 OS=Homo sapiens OX=9606 GN=COPG1 PE=1 SV=1	2.44361	2.61589	2.52	2.01436	2.31034	2.16
Q16204	Coiled-coil domain-containing protein 6 OS=Homo sapiens OX=9606 GN=CCDC6 PE=1 SV=2	2.25399	2.75916	2.5	1.75702	2.5656	2.16
O14976	Cyclin-G-associated kinase OS=Homo sapiens OX=9606 GN=GAK PE=1 SV=2	2.78241	2.1177	2.45	2.17313	2.15056	2.16
Q9UQ80	Proliferation-associated protein 2G4 OS=Homo sapiens OX=9606 GN=PA2G4 PE=1 SV=3	2.37851	2.47508	2.42	2.08406	2.23879	2.16
Q9Y6E2	Basic leucine zipper and W2 domain-containing protein 2 OS=Homo sapiens OX=9606 GN=BZW2 PE=1 SV=1	1.97453	2.85	2.41	1.79077	2.53356	2.16
O15327	Inositol polyphosphate 4-phosphatase type II OS=Homo sapiens OX=9606 GN=INPP4B PE=1 SV=4	2.98914	2.94298	2.96	2.10769	2.20163	2.15
Q12907	Vesicular integral-membrane protein VIP36 OS=Homo sapiens OX=9606 GN=LMAN2 PE=1 SV=1	2.76341	2.80735	2.78	1.7866	2.52356	2.15	√
Q9Y5L0	Transportin-3 OS=Homo sapiens OX=9606 GN=TNPO3 PE=1 SV=3	2.74846	2.77189	2.76	2.12102	2.18903	2.15
P34896	Serine hydroxymethyltransferase, cytosolic OS=Homo sapiens OX=9606 GN=SHMT1 PE=1 SV=1	2.74416	2.76977	2.75	1.95606	2.35332	2.15
O43865	S-adenosylhomocysteine hydrolase-like protein 1 OS=Homo sapiens OX=9606 GN=AHCYL1 PE=1 SV=2	2.80323	2.6017	2.7	1.91073	2.40871	2.15
P00338	L-lactate dehydrogenase A chain OS=Homo sapiens OX=9606 GN=LDHA PE=1 SV=2	2.50589	2.61117	2.55	1.8679	2.45154	2.15
P52306	Rap1 GTPase-GDP dissociation stimulator 1 OS=Homo sapiens OX=9606 GN=RAP1GDS1 PE=1 SV=3	2.36737	2.68257	2.52	1.852	2.46728	2.15
Q00341	Vigilin OS=Homo sapiens OX=9606 GN=HDLBP PE=1 SV=2	2.49825	2.42223	2.46	2	2.31325	2.15
Q9UBT2	SUMO-activating enzyme subunit 2 OS=Homo sapiens OX=9606 GN=UBA2 PE=1 SV=2	2.30451	2.488	2.39	1.78241	2.53107	2.15
P09960	Leukotriene A-4 hydrolase OS=Homo sapiens OX=9606 GN=LTA4H PE=1 SV=2	2.13093	2.5509	2.34	1.7137	2.58737	2.15
O60831	PRA1 family protein 2 OS=Homo sapiens OX=9606 GN=PRAF2 PE=1 SV=1	3.08066	2.97636	3.02	2.22342	2.0635	2.14	√	√
P41252	Isoleucine--tRNA ligase, cytoplasmic OS=Homo sapiens OX=9606 GN=IARS1 PE=1 SV=2	2.7137	2.76341	2.73	1.91456	2.37573	2.14
P50570	Dynamin-2 OS=Homo sapiens OX=9606 GN=DNM2 PE=1 SV=2	2.73118	2.7137	2.72	1.93734	2.34483	2.14
Q86VR2	Reticulophagy regulator 3 OS=Homo sapiens OX=9606 GN=RETREG3 PE=1 SV=1	2.74416	2.59932	2.67	1.93734	2.35332	2.14	√
Q9ULA0	Aspartyl aminopeptidase OS=Homo sapiens OX=9606 GN=DNPEP PE=1 SV=2	2.45943	2.59932	2.52	2.04264	2.23879	2.14
P25786	Proteasome subunit alpha type-1 OS=Homo sapiens OX=9606 GN=PSMA1 PE=1 SV=1	2.45418	2.51602	2.48	1.9782	2.31325	2.14
P12956	X-ray repair cross-complementing protein 6 OS=Homo sapiens OX=9606 GN=XRCC6 PE=1 SV=2	2.45943	2.44626	2.45	1.89918	2.39506	2.14		√
P50502	Hsc70-interacting protein OS=Homo sapiens OX=9606 GN=ST13 PE=1 SV=2	2.35614	2.51349	2.43	1.79494	2.49057	2.14
P56192	Methionine--tRNA ligase, cytoplasmic OS=Homo sapiens OX=9606 GN=MARS1 PE=1 SV=2	2.29866	2.50335	2.4	1.79494	2.49313	2.14
P40227	T-complex protein 1 subunit zeta OS=Homo sapiens OX=9606 GN=CCT6A PE=1 SV=3	2.50589	2.60881	2.55	1.94486	2.32193	2.13
P43304	Glycerol-3-phosphate dehydrogenase, mitochondrial OS=Homo sapiens OX=9606 GN=GPD2 PE=1 SV=3	2.4957	2.61589	2.55	2.01436	2.24793	2.13	√	√
P17987	T-complex protein 1 subunit alpha OS=Homo sapiens OX=9606 GN=TCP1 PE=1 SV=1	2.62293	2.3505	2.48	2.0635	2.20789	2.13
P24666	Low molecular weight phosphotyrosine protein phosphatase OS=Homo sapiens OX=9606 GN=ACP1 PE=1 SV=3	2.07382	2.12102	2.09	2.04614	2.22342	2.13
Q8TCU6	Phosphatidylinositol 3,4,5-trisphosphate-dependent Rac exchanger 1 protein OS=Homo sapiens OX=9606 GN=PREX1 PE=1 SV=3	2.78241	2.74201	2.76	1.79077	2.45943	2.12
Q96QK1	Vacuolar protein sorting-associated protein 35 OS=Homo sapiens OX=9606 GN=VPS35 PE=1 SV=2	2.56803	2.74846	2.65	1.72683	2.53107	2.12
Q9UHX1	Poly(U)-binding-splicing factor PUF60 OS=Homo sapiens OX=9606 GN=PUF60 PE=1 SV=1	2.3505	2.89918	2.62	1.86394	2.38405	2.12
Q15366	Poly(rC)-binding protein 2 OS=Homo sapiens OX=9606 GN=PCBP2 PE=1 SV=1	2.62994	2.58496	2.6	2.18269	2.0635	2.12
P49327	Fatty acid synthase OS=Homo sapiens OX=9606 GN=FASN PE=1 SV=3	2.51854	2.68032	2.59	1.90304	2.35614	2.12
P51659	Peroxisomal multifunctional enzyme type 2 OS=Homo sapiens OX=9606 GN=HSD17B4 PE=1 SV=3	2.52356	2.64847	2.58	1.93357	2.32193	2.12
P42166	Lamina-associated polypeptide 2, isoform alpha OS=Homo sapiens OX=9606 GN=TMPO PE=1 SV=2	2.54844	2.58256	2.56	1.97085	2.28096	2.12	√	√
P58107	Epiplakin OS=Homo sapiens OX=9606 GN=EPPK1 PE=1 SV=3	2.36177	2.68706	2.52	1.97453	2.27202	2.12
O60701	UDP-glucose 6-dehydrogenase OS=Homo sapiens OX=9606 GN=UGDH PE=1 SV=1	2.39232	2.64386	2.51	1.87578	2.36457	2.12
O14818	Proteasome subunit alpha type-7 OS=Homo sapiens OX=9606 GN=PSMA7 PE=1 SV=1	2.33914	2.63923	2.48	1.85599	2.40327	2.12
Q7Z406	Myosin-14 OS=Homo sapiens OX=9606 GN=MYH14 PE=1 SV=2	2.42761	2.52105	2.47	1.96717	2.28392	2.12
Q9P2J5	Leucine--tRNA ligase, cytoplasmic OS=Homo sapiens OX=9606 GN=LARS1 PE=1 SV=2	2.52356	2.27501	2.39	1.92979	2.31615	2.12		√
Q5SRH9	Tetratricopeptide repeat protein 39A OS=Homo sapiens OX=9606 GN=TTC39A PE=1 SV=1	2.37851	2.29866	2.33	1.90689	2.33342	2.12
P61619	Protein transport protein Sec61 subunit alpha isoform 1 OS=Homo sapiens OX=9606 GN=SEC61A1 PE=1 SV=2	2.72028	2.83592	2.77	1.99277	2.22959	2.11	√	√
Q9BSJ8	Extended synaptotagmin-1 OS=Homo sapiens OX=9606 GN=ESYT1 PE=1 SV=1	2.67129	2.75916	2.71	1.93734	2.28688	2.11	√	√
Q15046	Lysine--tRNA ligase OS=Homo sapiens OX=9606 GN=KARS1 PE=1 SV=3	2.57289	2.67582	2.62	2.04264	2.18587	2.11
Q9Y230	RuvB-like 2 OS=Homo sapiens OX=9606 GN=RUVBL2 PE=1 SV=3	2.45418	2.65764	2.55	1.89918	2.33342	2.11
O14617	AP-3 complex subunit delta-1 OS=Homo sapiens OX=9606 GN=AP3D1 PE=1 SV=1	2.33628	2.70929	2.52	1.79077	2.44095	2.11
P40926	Malate dehydrogenase, mitochondrial OS=Homo sapiens OX=9606 GN=MDH2 PE=1 SV=3	2.44095	2.58256	2.51	1.84398	2.38681	2.11
P46379	Large proline-rich protein BAG6 OS=Homo sapiens OX=9606 GN=BAG6 PE=1 SV=2	2.24489	2.72683	2.48	1.81147	2.40871	2.11		√
P00390	Glutathione reductase, mitochondrial OS=Homo sapiens OX=9606 GN=GSR PE=1 SV=2	2.43296	2.51854	2.47	2.08746	2.15056	2.11
P45974	Ubiquitin carboxyl-terminal hydrolase 5 OS=Homo sapiens OX=9606 GN=USP5 PE=1 SV=2	2.55336	2.39232	2.47	1.93734	2.28392	2.11
Q96D46	60S ribosomal export protein NMD3 OS=Homo sapiens OX=9606 GN=NMD3 PE=1 SV=1	2.32193	2.61824	2.47	1.99639	2.23266	2.11
P19174	1-phosphatidylinositol 4,5-bisphosphate phosphodiesterase gamma-1 OS=Homo sapiens OX=9606 GN=PLCG1 PE=1 SV=1	2.31034	2.57531	2.44	1.96347	2.27202	2.11
Q08211	ATP-dependent RNA helicase A OS=Homo sapiens OX=9606 GN=DHX9 PE=1 SV=4	2.41684	2.40599	2.41	1.95233	2.27501	2.11
P61289	Proteasome activator complex subunit 3 OS=Homo sapiens OX=9606 GN=PSME3 PE=1 SV=1	1.95977	2.76977	2.36	1.96347	2.27202	2.11
Q27J81	Inverted formin-2 OS=Homo sapiens OX=9606 GN=INF2 PE=1 SV=2	2.36177	2.35332	2.35	2.05658	2.16672	2.11
Q9Y6Y8	SEC23-interacting protein OS=Homo sapiens OX=9606 GN=SEC23IP PE=1 SV=1	3.1127	2.43563	2.77	2.10434	2.11437	2.1
P63010	AP-2 complex subunit beta OS=Homo sapiens OX=9606 GN=AP2B1 PE=1 SV=1	2.60407	2.79494	2.69	1.9486	2.25701	2.1
Q9Y679	Lipid droplet-regulating VLDL assembly factor AUP1 OS=Homo sapiens OX=9606 GN=AUP1 PE=1 SV=2	2.77189	2.60407	2.68	1.92979	2.27202	2.1	√	√
P49755	Transmembrane emp24 domain-containing protein 10 OS=Homo sapiens OX=9606 GN=TMED10 PE=1 SV=2	2.61117	2.61824	2.61	1.99277	2.22651	2.1	√	√
P78527	DNA-dependent protein kinase catalytic subunit OS=Homo sapiens OX=9606 GN=PRKDC PE=1 SV=3	2.52857	2.58976	2.55	1.926	2.29278	2.1
Q13618	Cullin-3 OS=Homo sapiens OX=9606 GN=CUL3 PE=1 SV=2	2.29278	2.58737	2.44	1.774	2.44361	2.1
Q7KZF4	Staphylococcal nuclease domain-containing protein 1 OS=Homo sapiens OX=9606 GN=SND1 PE=1 SV=1	2.22033	2.59455	2.4	1.84398	2.37573	2.1
P60981	Destrin OS=Homo sapiens OX=9606 GN=DSTN PE=1 SV=3	2.32481	2.46728	2.39	1.88362	2.31904	2.1
P12429	Annexin A3 OS=Homo sapiens OX=9606 GN=ANXA3 PE=1 SV=3	2.25701	2.44626	2.35	1.88753	2.31615	2.1
P07737	Profilin-1 OS=Homo sapiens OX=9606 GN=PFN1 PE=1 SV=2	2.32769	2.14405	2.23	1.91073	2.30451	2.1
Q06830	Peroxiredoxin-1 OS=Homo sapiens OX=9606 GN=PRDX1 PE=1 SV=1	2.70708	2.59932	2.65	1.83188	2.35614	2.09
P51570	Galactokinase OS=Homo sapiens OX=9606 GN=GALK1 PE=1 SV=1	2.6017	2.67807	2.63	1.98185	2.20789	2.09
P49189	4-trimethylaminobutyraldehyde dehydrogenase OS=Homo sapiens OX=9606 GN=ALDH9A1 PE=1 SV=3	2.61117	2.63227	2.62	2.06695	2.13093	2.09
Q9NR09	Baculoviral IAP repeat-containing protein 6 OS=Homo sapiens OX=9606 GN=BIRC6 PE=1 SV=2	2.53107	2.60644	2.56	2.15056	2.04614	2.09
Q9H993	Damage-control phosphatase ARMT1 OS=Homo sapiens OX=9606 GN=ARMT1 PE=1 SV=1	2.68706	2.40054	2.54	1.8953	2.29866	2.09
P48449	Lanosterol synthase OS=Homo sapiens OX=9606 GN=LSS PE=1 SV=1	2.48285	2.57289	2.52	2.12763	2.05658	2.09	√	√
P14866	Heterogeneous nuclear ribonucleoprotein L OS=Homo sapiens OX=9606 GN=HNRNPL PE=1 SV=2	2.35896	2.64616	2.5	1.87971	2.31904	2.09
P22234	Multifunctional protein ADE2 OS=Homo sapiens OX=9606 GN=PAICS PE=1 SV=3	2.45681	2.54597	2.5	1.87184	2.31325	2.09
Q9Y3I0	RNA-splicing ligase RtcB homolog OS=Homo sapiens OX=9606 GN=RTCB PE=1 SV=1	2.52607	2.46989	2.49	1.84398	2.33914	2.09
P43686	26S proteasome regulatory subunit 6B OS=Homo sapiens OX=9606 GN=PSMC4 PE=1 SV=2	2.49313	2.75916	2.62	1.84398	2.32193	2.08
P13798	Acylamino-acid-releasing enzyme OS=Homo sapiens OX=9606 GN=APEH PE=1 SV=4	2.55827	2.67129	2.61	1.848	2.33056	2.08
Q9C0C9	(E3-independent) E2 ubiquitin-conjugating enzyme OS=Homo sapiens OX=9606 GN=UBE2O PE=1 SV=3	2.45681	2.74416	2.6	1.72247	2.44361	2.08
P26583	High mobility group protein B2 OS=Homo sapiens OX=9606 GN=HMGB2 PE=1 SV=2	2.47508	2.69599	2.58	1.926	2.25399	2.08
Q16698	2,4-dienoyl-CoA reductase [(3E)-enoyl-CoA-producing], mitochondrial OS=Homo sapiens OX=9606 GN=DECR1 PE=1 SV=1	2.52356	2.54102	2.53	1.87184	2.29278	2.08
Q8TEX9	Importin-4 OS=Homo sapiens OX=9606 GN=IPO4 PE=1 SV=2	2.36177	2.60407	2.48	1.87184	2.29278	2.08
P35232	Prohibitin OS=Homo sapiens OX=9606 GN=PHB PE=1 SV=1	2.35332	2.57773	2.46	1.71809	2.45418	2.08	√	√
Q9Y2A7	Nck-associated protein 1 OS=Homo sapiens OX=9606 GN=NCKAP1 PE=1 SV=1	2.30451	2.37295	2.33	1.72683	2.45154	2.08
Q14566	DNA replication licensing factor MCM6 OS=Homo sapiens OX=9606 GN=MCM6 PE=1 SV=1	2.28096	2.36177	2.32	1.84398	2.33342	2.08
P13693	Translationally-controlled tumor protein OS=Homo sapiens OX=9606 GN=TPT1 PE=1 SV=1	2.27501	2.30743	2.29	1.82782	2.33628	2.08
P27694	Replication protein A 70 kDa DNA-binding subunit OS=Homo sapiens OX=9606 GN=RPA1 PE=1 SV=2	2.85	2.92979	2.88	1.80735	2.34199	2.07
O95202	Mitochondrial proton/calcium exchanger protein OS=Homo sapiens OX=9606 GN=LETM1 PE=1 SV=1	2.88557	2.8679	2.87	2.07382	2.07039	2.07	√	√
P54136	Arginine--tRNA ligase, cytoplasmic OS=Homo sapiens OX=9606 GN=RARS1 PE=1 SV=2	2.68032	2.71809	2.69	1.88753	2.25399	2.07
Q8TC12	Retinol dehydrogenase 11 OS=Homo sapiens OX=9606 GN=RDH11 PE=1 SV=2	2.57773	2.54844	2.56	1.96347	2.18587	2.07	√	√
O15260	Surfeit locus protein 4 OS=Homo sapiens OX=9606 GN=SURF4 PE=1 SV=3	2.27501	2.7137	2.49	1.81147	2.34483	2.07	√	√
P53007	Tricarboxylate transport protein, mitochondrial OS=Homo sapiens OX=9606 GN=SLC25A1 PE=1 SV=2	2.29278	2.60881	2.45	2.12763	2.0321	2.07	√	√
Q14204	Cytoplasmic dynein 1 heavy chain 1 OS=Homo sapiens OX=9606 GN=DYNC1H1 PE=1 SV=5	2.37851	2.39232	2.38	1.9222	2.22033	2.07
O43813	Glutathione S-transferase LANCL1 OS=Homo sapiens OX=9606 GN=LANCL1 PE=1 SV=1	2.43829	2.30159	2.36	2.07382	2.07382	2.07
Q8N335	Glycerol-3-phosphate dehydrogenase 1-like protein OS=Homo sapiens OX=9606 GN=GPD1L PE=1 SV=1	2.08406	2.63691	2.36	1.93734	2.21412	2.07
Q9UHY1	Nuclear receptor-binding protein OS=Homo sapiens OX=9606 GN=NRBP1 PE=1 SV=1	2.33342	2.29572	2.31	1.92979	2.22959	2.07
Q14247	Src substrate cortactin OS=Homo sapiens OX=9606 GN=CTTN PE=1 SV=2	2.27202	2.33056	2.3	1.91839	2.22342	2.07
P15170	Eukaryotic peptide chain release factor GTP-binding subunit ERF3A OS=Homo sapiens OX=9606 GN=GSPT1 PE=1 SV=1	2.01078	2.50589	2.25	1.75702	2.40054	2.07
Q9NYL9	Tropomodulin-3 OS=Homo sapiens OX=9606 GN=TMOD3 PE=1 SV=1	2.06005	2.04963	2.05	1.99277	2.15704	2.07
Q9Y5X3	Sorting nexin-5 OS=Homo sapiens OX=9606 GN=SNX5 PE=1 SV=1	2.48543	2.78031	2.63	1.9782	2.15704	2.06
P33176	Kinesin-1 heavy chain OS=Homo sapiens OX=9606 GN=KIF5B PE=1 SV=1	2.37573	2.75061	2.56	1.852	2.27798	2.06
Q96HE7	ERO1-like protein alpha OS=Homo sapiens OX=9606 GN=ERO1A PE=1 SV=2	2.47249	2.52105	2.49	2.04264	2.08746	2.06		√
O75131	Copine-3 OS=Homo sapiens OX=9606 GN=CPNE3 PE=1 SV=1	2.30451	2.54597	2.42	1.7866	2.33342	2.06
A0A0B4J2D5	Glutamine amidotransferase-like class 1 domain-containing protein 3B, mitochondrial OS=Homo sapiens OX=9606 GN=GATD3B PE=1 SV=1	2.20477	2.62293	2.41	1.852	2.28096	2.06
Q10567	AP-1 complex subunit beta-1 OS=Homo sapiens OX=9606 GN=AP1B1 PE=1 SV=2	2.46989	2.31904	2.39	1.9222	2.20163	2.06
P11177	Pyruvate dehydrogenase E1 component subunit beta, mitochondrial OS=Homo sapiens OX=9606 GN=PDHB PE=1 SV=3	2.24184	2.50335	2.37	1.83592	2.28688	2.06
Q99497	Parkinson disease protein 7 OS=Homo sapiens OX=9606 GN=PARK7 PE=1 SV=2	2.22033	2.23266	2.22	1.78241	2.33914	2.06
P29692	Elongation factor 1-delta OS=Homo sapiens OX=9606 GN=EEF1D PE=1 SV=5	2.04264	2.38957	2.21	1.79077	2.34483	2.06
P17655	Calpain-2 catalytic subunit OS=Homo sapiens OX=9606 GN=CAPN2 PE=1 SV=6	2.59455	2.74416	2.66	1.99277	2.12433	2.05
P19367	Hexokinase-1 OS=Homo sapiens OX=9606 GN=HK1 PE=1 SV=3	2.38405	2.80323	2.59	1.60407	2.50589	2.05	√	√
O14744	Protein arginine N-methyltransferase 5 OS=Homo sapiens OX=9606 GN=PRMT5 PE=1 SV=4	2.44361	2.59216	2.51	1.65992	2.45681	2.05
P50990	T-complex protein 1 subunit theta OS=Homo sapiens OX=9606 GN=CCT8 PE=1 SV=4	2.4957	2.47249	2.48	1.89918	2.20789	2.05
P46459	Vesicle-fusing ATPase OS=Homo sapiens OX=9606 GN=NSF PE=1 SV=3	2.24184	2.44361	2.34	1.85599	2.25701	2.05
O15269	Serine palmitoyltransferase 1 OS=Homo sapiens OX=9606 GN=SPTLC1 PE=1 SV=1	2.87381	2.86394	2.86	2.12433	1.97453	2.04	√	√
O15357	Phosphatidylinositol 3,4,5-trisphosphate 5-phosphatase 2 OS=Homo sapiens OX=9606 GN=INPPL1 PE=1 SV=2	2.41414	3.0036	2.7	1.60881	2.488	2.04
P07384	Calpain-1 catalytic subunit OS=Homo sapiens OX=9606 GN=CAPN1 PE=1 SV=1	2.5008	2.61589	2.55	1.81147	2.28688	2.04
Q9BUJ2	Heterogeneous nuclear ribonucleoprotein U-like protein 1 OS=Homo sapiens OX=9606 GN=HNRNPUL1 PE=1 SV=2	2.61117	2.38128	2.49	1.95977	2.12102	2.04
Q13813	Spectrin alpha chain, non-erythrocytic 1 OS=Homo sapiens OX=9606 GN=SPTAN1 PE=1 SV=3	2.42223	2.55336	2.48	1.91073	2.18587	2.04
P42858	Huntingtin OS=Homo sapiens OX=9606 GN=HTT PE=1 SV=2	2.73552	2.22959	2.48	2.09761	1.98914	2.04
P52272	Heterogeneous nuclear ribonucleoprotein M OS=Homo sapiens OX=9606 GN=HNRNPM PE=1 SV=3	2.54102	2.21101	2.37	1.97085	2.11103	2.04		√
P11586	C-1-tetrahydrofolate synthase, cytoplasmic OS=Homo sapiens OX=9606 GN=MTHFD1 PE=1 SV=4	2.31034	2.42223	2.36	1.926	2.16027	2.04
P09622	Dihydrolipoyl dehydrogenase, mitochondrial OS=Homo sapiens OX=9606 GN=DLD PE=1 SV=2	2.77189	1.85997	2.31	2.29278	1.79077	2.04
P17931	Galectin-3 OS=Homo sapiens OX=9606 GN=LGALS3 PE=1 SV=5	2.12433	2.03914	2.08	1.93734	2.15704	2.04
P02765	Alpha-2-HS-glycoprotein OS=Homo sapiens OX=9606 GN=AHSG PE=1 SV=2	3.42626	3.29278	3.35	2.09761	1.9782	2.03
P05141	ADP/ATP translocase 2 OS=Homo sapiens OX=9606 GN=SLC25A5 PE=1 SV=7	3.32337	3.26153	3.29	1.852	2.21412	2.03	√	√
P08962	CD63 antigen OS=Homo sapiens OX=9606 GN=CD63 PE=1 SV=2	2.60644	3.08406	2.84	1.852	2.21412	2.03	√	√
O95470	Sphingosine-1-phosphate lyase 1 OS=Homo sapiens OX=9606 GN=SGPL1 PE=1 SV=3	2.71149	2.65764	2.68	1.98914	2.09085	2.03	√	√
Q86UE4	Protein LYRIC OS=Homo sapiens OX=9606 GN=MTDH PE=1 SV=2	2.74846	2.46989	2.6	1.94111	2.12763	2.03	√	√
Q13617	Cullin-2 OS=Homo sapiens OX=9606 GN=CUL2 PE=1 SV=2	2.50335	2.70929	2.6	2.16672	1.89918	2.03
P32969	60S ribosomal protein L9 OS=Homo sapiens OX=9606 GN=RPL9 PE=1 SV=1	2.3505	2.38681	2.36	1.91839	2.14405	2.03
O75439	Mitochondrial-processing peptidase subunit beta OS=Homo sapiens OX=9606 GN=PMPCB PE=1 SV=2	2.03914	2.69153	2.36	1.83592	2.24184	2.03		√
Q14697	Neutral alpha-glucosidase AB OS=Homo sapiens OX=9606 GN=GANAB PE=1 SV=3	2.29866	2.29866	2.29	1.76553	2.30743	2.03
Q9HD20	Endoplasmic reticulum transmembrane helix translocase OS=Homo sapiens OX=9606 GN=ATP13A1 PE=1 SV=2	2.33628	2.06005	2.19	1.94486	2.12763	2.03	√	√
Q96PC5	Melanoma inhibitory activity protein 2 OS=Homo sapiens OX=9606 GN=MIA2 PE=1 SV=4	2.9222	2.73769	2.82	1.926	2.12433	2.02	√
A5YKK6	CCR4-NOT transcription complex subunit 1 OS=Homo sapiens OX=9606 GN=CNOT1 PE=1 SV=2	2.36457	3.18903	2.77	1.64155	2.40327	2.02
O00410	Importin-5 OS=Homo sapiens OX=9606 GN=IPO5 PE=1 SV=4	2.71809	2.69153	2.7	2.16672	1.87971	2.02
P41250	Glycine--tRNA ligase OS=Homo sapiens OX=9606 GN=GARS1 PE=1 SV=3	2.60407	2.58737	2.59	1.64155	2.40327	2.02
O75643	U5 small nuclear ribonucleoprotein 200 kDa helicase OS=Homo sapiens OX=9606 GN=SNRNP200 PE=1 SV=2	2.49313	2.62293	2.55	2	2.05311	2.02
P50991	T-complex protein 1 subunit delta OS=Homo sapiens OX=9606 GN=CCT4 PE=1 SV=4	2.37851	2.49057	2.43	1.85997	2.19849	2.02
Q6P1M3	LLGL scribble cell polarity complex component 2 OS=Homo sapiens OX=9606 GN=LLGL2 PE=1 SV=2	2.35332	2.50843	2.43	1.77821	2.26303	2.02
Q13263	Transcription intermediary factor 1-beta OS=Homo sapiens OX=9606 GN=TRIM28 PE=1 SV=5	2.52105	2.32193	2.42	1.90689	2.1375	2.02
O94906	Pre-mRNA-processing factor 6 OS=Homo sapiens OX=9606 GN=PRPF6 PE=1 SV=1	2.23573	2.56071	2.39	1.86394	2.19535	2.02
Q13620	Cullin-4B OS=Homo sapiens OX=9606 GN=CUL4B PE=1 SV=4	2.46467	2.22033	2.34	1.84398	2.19849	2.02
Q9BXP5	Serrate RNA effector molecule homolog OS=Homo sapiens OX=9606 GN=SRRT PE=1 SV=1	2.50335	2.08066	2.29	1.848	2.20477	2.02
P31939	Bifunctional purine biosynthesis protein ATIC OS=Homo sapiens OX=9606 GN=ATIC PE=1 SV=3	2.10098	2.45418	2.27	1.75702	2.28392	2.02
Q9UJS0	Calcium-binding mitochondrial carrier protein Aralar2 OS=Homo sapiens OX=9606 GN=SLC25A13 PE=1 SV=2	2.78869	1.61824	2.2	2.1375	1.90689	2.02	√	√
O95757	Heat shock 70 kDa protein 4L OS=Homo sapiens OX=9606 GN=HSPA4L PE=1 SV=3	2.22342	2.17313	2.19	1.9855	2.07382	2.02
P22059	Oxysterol-binding protein 1 OS=Homo sapiens OX=9606 GN=OSBP PE=1 SV=1	3.12928	3.17632	3.15	1.96717	2.05658	2.01	√	√
Q15758	Neutral amino acid transporter B(0) OS=Homo sapiens OX=9606 GN=SLC1A5 PE=1 SV=2	2.48285	2.66676	2.57	1.81147	2.21723	2.01	√	√
P16152	Carbonyl reductase [NADPH] 1 OS=Homo sapiens OX=9606 GN=CBR1 PE=1 SV=3	2.46467	2.5008	2.48	1.77821	2.24184	2.01
P62714	Serine/threonine-protein phosphatase 2A catalytic subunit beta isoform OS=Homo sapiens OX=9606 GN=PPP2CB PE=1 SV=1	2.54844	2.39232	2.47	1.53605	2.49313	2.01
P07437	Tubulin beta chain OS=Homo sapiens OX=9606 GN=TUBB PE=1 SV=2	2.46989	2.46205	2.46	1.85997	2.16992	2.01
P61160	Actin-related protein 2 OS=Homo sapiens OX=9606 GN=ACTR2 PE=1 SV=1	2.22651	2.53605	2.38	1.59932	2.43296	2.01
Q08J23	RNA cytosine C(5)-methyltransferase NSUN2 OS=Homo sapiens OX=9606 GN=NSUN2 PE=1 SV=2	2.26003	2.4957	2.37	1.84398	2.19219	2.01
Q92544	Transmembrane 9 superfamily member 4 OS=Homo sapiens OX=9606 GN=TM9SF4 PE=1 SV=2	2.30159	2.36737	2.33	1.83592	2.18903	2.01	√	√
P67936	Tropomyosin alpha-4 chain OS=Homo sapiens OX=9606 GN=TPM4 PE=1 SV=3	2.41143	2.16027	2.28	1.87971	2.14405	2.01
Q6P1M0	Long-chain fatty acid transport protein 4 OS=Homo sapiens OX=9606 GN=SLC27A4 PE=1 SV=1	2.0635	1.99639	2.02	1.70044	2.32769	2.01	√	√
Q86Y56	Dynein axonemal assembly factor 5 OS=Homo sapiens OX=9606 GN=DNAAF5 PE=1 SV=4	3.12598	2.66448	2.89	1.61824	2.38957	2
Q01082	Spectrin beta chain, non-erythrocytic 1 OS=Homo sapiens OX=9606 GN=SPTBN1 PE=1 SV=2	2.43029	2.40327	2.41	1.8953	2.11437	2		√
Q9NSD9	Phenylalanine--tRNA ligase beta subunit OS=Homo sapiens OX=9606 GN=FARSB PE=1 SV=3	2.24793	2.58496	2.41	1.80735	2.20789	2
P09874	Poly [ADP-ribose] polymerase 1 OS=Homo sapiens OX=9606 GN=PARP1 PE=1 SV=4	2.28096	2.43029	2.35	1.81967	2.19849	2
Q15020	Squamous cell carcinoma antigen recognized by T-cells 3 OS=Homo sapiens OX=9606 GN=SART3 PE=1 SV=1	2.56803	1.852	2.21	1.9855	2.02857	2
P09467	Fructose-1,6-bisphosphatase 1 OS=Homo sapiens OX=9606 GN=FBP1 PE=1 SV=5	2.68257	2.80323	2.74	1.67807	2.30743	1.99
Q8TEQ6	Gem-associated protein 5 OS=Homo sapiens OX=9606 GN=GEMIN5 PE=1 SV=3	2.59694	2.66903	2.63	1.77821	2.21101	1.99
O76094	Signal recognition particle subunit SRP72 OS=Homo sapiens OX=9606 GN=SRP72 PE=1 SV=3	2.66676	2.42761	2.54	2.14731	1.848	1.99
Q15393	Splicing factor 3B subunit 3 OS=Homo sapiens OX=9606 GN=SF3B3 PE=1 SV=4	2.45681	2.46989	2.46	1.94111	2.04264	1.99
P11216	Glycogen phosphorylase, brain form OS=Homo sapiens OX=9606 GN=PYGB PE=1 SV=5	2.5008	2.35614	2.42	1.81967	2.17951	1.99
Q9NZL4	Hsp70-binding protein 1 OS=Homo sapiens OX=9606 GN=HSPBP1 PE=1 SV=2	1.93357	2.88362	2.4	1.53605	2.46205	1.99
P30041	Peroxiredoxin-6 OS=Homo sapiens OX=9606 GN=PRDX6 PE=1 SV=3	2.29572	2.46467	2.38	1.79077	2.19219	1.99
P15311	Ezrin OS=Homo sapiens OX=9606 GN=EZR PE=1 SV=4	2.08066	2.35614	2.21	1.76129	2.22959	1.99
Q7Z2K6	Endoplasmic reticulum metallopeptidase 1 OS=Homo sapiens OX=9606 GN=ERMP1 PE=1 SV=2	2.57531	2.70266	2.63	1.96347	2.0036	1.98	√	√
O43765	Small glutamine-rich tetratricopeptide repeat-containing protein alpha OS=Homo sapiens OX=9606 GN=SGTA PE=1 SV=1	2.59694	2.65992	2.62	1.60881	2.36457	1.98
P20020	Plasma membrane calcium-transporting ATPase 1 OS=Homo sapiens OX=9606 GN=ATP2B1 PE=1 SV=4	2.54102	2.62994	2.58	1.76129	2.21101	1.98	√	√
Q9Y5B9	FACT complex subunit SPT16 OS=Homo sapiens OX=9606 GN=SUPT16H PE=1 SV=1	2.43029	2.59216	2.51	1.63227	2.33342	1.98
Q9UNE7	E3 ubiquitin-protein ligase CHIP OS=Homo sapiens OX=9606 GN=STUB1 PE=1 SV=2	1.95977	2.39506	2.17	1.82375	2.15381	1.98
Q9BQE5	Apolipoprotein L2 OS=Homo sapiens OX=9606 GN=APOL2 PE=1 SV=1	3.01792	3.02857	3.02	2.13093	1.82375	1.97	√
Q9Y394	Dehydrogenase/reductase SDR family member 7 OS=Homo sapiens OX=9606 GN=DHRS7 PE=1 SV=1	2.98732	3.02326	3	1.42223	2.52857	1.97	√	√
Q9NSE4	Isoleucine--tRNA ligase, mitochondrial OS=Homo sapiens OX=9606 GN=IARS2 PE=1 SV=2	2.72901	2.53107	2.63	1.90689	2.04963	1.97		√
Q86UP2	Kinectin OS=Homo sapiens OX=9606 GN=KTN1 PE=1 SV=1	2.53356	2.49057	2.51	1.60881	2.34483	1.97	√	√
Q9BYK8	Helicase with zinc finger domain 2 OS=Homo sapiens OX=9606 GN=HELZ2 PE=1 SV=6	2.37016	2.61353	2.49	1.83188	2.11103	1.97
O95373	Importin-7 OS=Homo sapiens OX=9606 GN=IPO7 PE=1 SV=1	2.47249	2.50335	2.48	1.81147	2.14078	1.97
Q9H0B6	Kinesin light chain 2 OS=Homo sapiens OX=9606 GN=KLC2 PE=1 SV=1	1.83592	3.12267	2.47	1.42223	2.52607	1.97
Q14203	Dynactin subunit 1 OS=Homo sapiens OX=9606 GN=DCTN1 PE=1 SV=3	2.42761	2.28688	2.35	1.85599	2.10098	1.97
O43747	AP-1 complex subunit gamma-1 OS=Homo sapiens OX=9606 GN=AP1G1 PE=1 SV=5	2.63923	1.926	2.28	1.98914	1.96347	1.97
Q06323	Proteasome activator complex subunit 1 OS=Homo sapiens OX=9606 GN=PSME1 PE=1 SV=1	2.52356	2.53854	2.53	1.76977	2.16992	1.96
P06396	Gelsolin OS=Homo sapiens OX=9606 GN=GSN PE=1 SV=1	2.45154	2.41954	2.43	1.80323	2.1177	1.96
Q5T4S7	E3 ubiquitin-protein ligase UBR4 OS=Homo sapiens OX=9606 GN=UBR4 PE=1 SV=1	2.44361	2.42492	2.43	1.84398	2.09424	1.96
P15880	40S ribosomal protein S2 OS=Homo sapiens OX=9606 GN=RPS2 PE=1 SV=2	2.21723	2.38405	2.3	1.80323	2.1177	1.96
P49411	Elongation factor Tu, mitochondrial OS=Homo sapiens OX=9606 GN=TUFM PE=1 SV=2	2.1177	2.43829	2.27	1.65076	2.28392	1.96
P59998	Actin-related protein 2/3 complex subunit 4 OS=Homo sapiens OX=9606 GN=ARPC4 PE=1 SV=3	2.21412	2.26303	2.23	1.90689	2.0321	1.96
P04114	Apolipoprotein B-100 OS=Homo sapiens OX=9606 GN=APOB PE=1 SV=2	2.68257	2.67582	2.67	1.91073	1.99639	1.95		√
P31150	Rab GDP dissociation inhibitor alpha OS=Homo sapiens OX=9606 GN=GDI1 PE=1 SV=2	2.32481	2.58976	2.45	1.82782	2.08746	1.95
P13667	Protein disulfide-isomerase A4 OS=Homo sapiens OX=9606 GN=PDIA4 PE=1 SV=2	2.21101	2.37295	2.29	1.7866	2.12763	1.95
O75369	Filamin-B OS=Homo sapiens OX=9606 GN=FLNB PE=1 SV=2	2.27501	2.26303	2.26	1.82782	2.08406	1.95
P27797	Calreticulin OS=Homo sapiens OX=9606 GN=CALR PE=1 SV=1	2.02503	2.23266	2.12	1.7137	2.20163	1.95		√
Q9UHG3	Prenylcysteine oxidase 1 OS=Homo sapiens OX=9606 GN=PCYOX1 PE=1 SV=3	2.7845	2.86987	2.82	1.96717	1.91839	1.94	√	√
P78347	General transcription factor II-I OS=Homo sapiens OX=9606 GN=GTF2I PE=1 SV=2	2.83996	2.59216	2.71	1.59932	2.28688	1.94
P53396	ATP-citrate synthase OS=Homo sapiens OX=9606 GN=ACLY PE=1 SV=3	2.61353	2.65764	2.63	1.83996	2.04614	1.94
Q96S66	Chloride channel CLIC-like protein 1 OS=Homo sapiens OX=9606 GN=CLCC1 PE=1 SV=1	2.36457	2.83794	2.6	1.73985	2.15381	1.94	√	√
Q08722	Leukocyte surface antigen CD47 OS=Homo sapiens OX=9606 GN=CD47 PE=1 SV=1	2.4489	2.71149	2.58	1.64616	2.24184	1.94
Q14008	Cytoskeleton-associated protein 5 OS=Homo sapiens OX=9606 GN=CKAP5 PE=1 SV=3	2.27202	2.53107	2.4	1.62293	2.27501	1.94
O75153	Clustered mitochondria protein homolog OS=Homo sapiens OX=9606 GN=CLUH PE=1 SV=2	2.21412	2.49313	2.35	1.56071	2.33628	1.94		√
Q9H845	Complex I assembly factor ACAD9, mitochondrial OS=Homo sapiens OX=9606 GN=ACAD9 PE=1 SV=1	2.23266	2.46989	2.35	1.73985	2.15704	1.94		√
Q6DD88	Atlastin-3 OS=Homo sapiens OX=9606 GN=ATL3 PE=1 SV=1	2.43296	2.26003	2.34	1.81558	2.07724	1.94	√	√
Q12789	General transcription factor 3C polypeptide 1 OS=Homo sapiens OX=9606 GN=GTF3C1 PE=1 SV=4	2.21723	2.33914	2.27	1.87578	2.01436	1.94
P25705	ATP synthase subunit alpha, mitochondrial OS=Homo sapiens OX=9606 GN=ATP5F1A PE=1 SV=1	2.23879	2.27501	2.25	1.79909	2.08406	1.94		√
P00966	Argininosuccinate synthase OS=Homo sapiens OX=9606 GN=ASS1 PE=1 SV=2	2.11437	2.32769	2.22	2.0036	1.8953	1.94
P53041	Serine/threonine-protein phosphatase 5 OS=Homo sapiens OX=9606 GN=PPP5C PE=1 SV=1	2.1375	2.25701	2.19	1.75702	2.12433	1.94
P30086	Phosphatidylethanolamine-binding protein 1 OS=Homo sapiens OX=9606 GN=PEBP1 PE=1 SV=3	1.91073	2.24793	2.07	1.62293	2.26003	1.94
Q2M389	WASH complex subunit 4 OS=Homo sapiens OX=9606 GN=WASHC4 PE=1 SV=2	2.50335	2.34483	2.42	1.75275	2.11103	1.93
O43242	26S proteasome non-ATPase regulatory subunit 3 OS=Homo sapiens OX=9606 GN=PSMD3 PE=1 SV=2	2.26903	2.44626	2.35	1.83996	2.02857	1.93		√
P31153	S-adenosylmethionine synthase isoform type-2 OS=Homo sapiens OX=9606 GN=MAT2A PE=1 SV=1	2.55827	2.12763	2.34	1.8953	1.9782	1.93
Q7Z2W4	Zinc finger CCCH-type antiviral protein 1 OS=Homo sapiens OX=9606 GN=ZC3HAV1 PE=1 SV=3	2.18587	2.40327	2.29	1.7137	2.1635	1.93
P78371	T-complex protein 1 subunit beta OS=Homo sapiens OX=9606 GN=CCT2 PE=1 SV=4	2.02148	2.3978	2.2	1.63691	2.23573	1.93
Q9Y570	Protein phosphatase methylesterase 1 OS=Homo sapiens OX=9606 GN=PPME1 PE=1 SV=3	2	2.30743	2.15	1.87578	2.0036	1.93
Q12931	Heat shock protein 75 kDa, mitochondrial OS=Homo sapiens OX=9606 GN=TRAP1 PE=1 SV=3	2.56316	2.53605	2.54	1.62761	2.21723	1.92
Q99873	Protein arginine N-methyltransferase 1 OS=Homo sapiens OX=9606 GN=PRMT1 PE=1 SV=3	2.52607	2.53854	2.53	1.72683	2.12102	1.92
P17858	ATP-dependent 6-phosphofructokinase, liver type OS=Homo sapiens OX=9606 GN=PFKL PE=1 SV=6	2.62994	2.40871	2.51	1.88362	1.96717	1.92
P55036	26S proteasome non-ATPase regulatory subunit 4 OS=Homo sapiens OX=9606 GN=PSMD4 PE=1 SV=1	2.40599	2.53605	2.47	1.73985	2.10434	1.92
P15924	Desmoplakin OS=Homo sapiens OX=9606 GN=DSP PE=1 SV=3	2.40327	2.47249	2.43	1.57531	2.26604	1.92
P17812	CTP synthase 1 OS=Homo sapiens OX=9606 GN=CTPS1 PE=1 SV=2	2.23573	2.29572	2.26	1.69599	2.15056	1.92
P35241	Radixin OS=Homo sapiens OX=9606 GN=RDX PE=1 SV=1	2.04963	2.45418	2.25	1.61353	2.23573	1.92
P35221	Catenin alpha-1 OS=Homo sapiens OX=9606 GN=CTNNA1 PE=1 SV=1	2.67807	2.85	2.76	1.79909	2.03914	1.91
Q9HD45	Transmembrane 9 superfamily member 3 OS=Homo sapiens OX=9606 GN=TM9SF3 PE=1 SV=2	2.51349	2.42761	2.47	1.95233	1.87578	1.91	√	√
Q9NYU2	UDP-glucose:glycoprotein glucosyltransferase 1 OS=Homo sapiens OX=9606 GN=UGGT1 PE=1 SV=3	2.36457	2.39232	2.37	1.82375	2.01078	1.91
P55084	Trifunctional enzyme subunit beta, mitochondrial OS=Homo sapiens OX=9606 GN=HADHB PE=1 SV=3	1.95977	2.48285	2.22	1.69153	2.1375	1.91
Q96AE4	Far upstream element-binding protein 1 OS=Homo sapiens OX=9606 GN=FUBP1 PE=1 SV=3	2.16672	2.25399	2.21	1.69599	2.12763	1.91		√
Q16850	Lanosterol 14-alpha demethylase OS=Homo sapiens OX=9606 GN=CYP51A1 PE=1 SV=3	3.04439	2.89724	2.97	1.85997	1.95977	1.9	√	√
P02786	Transferrin receptor protein 1 OS=Homo sapiens OX=9606 GN=TFRC PE=1 SV=2	2.72465	2.7137	2.71	1.76129	2.04963	1.9	√	√
Q9Y262	Eukaryotic translation initiation factor 3 subunit L OS=Homo sapiens OX=9606 GN=EIF3L PE=1 SV=1	2.45418	2.67582	2.56	1.88362	1.92979	1.9
O00170	AH receptor-interacting protein OS=Homo sapiens OX=9606 GN=AIP PE=1 SV=2	2.38681	2.67807	2.53	1.7137	2.08746	1.9
P49589	Cysteine--tRNA ligase, cytoplasmic OS=Homo sapiens OX=9606 GN=CARS1 PE=1 SV=3	2.32481	2.26303	2.29	1.77821	2.02503	1.9
Q9UL25	Ras-related protein Rab-21 OS=Homo sapiens OX=9606 GN=RAB21 PE=1 SV=3	2.10769	2.26903	2.18	1.65992	2.15056	1.9
P18669	Phosphoglycerate mutase 1 OS=Homo sapiens OX=9606 GN=PGAM1 PE=1 SV=2	2.04614	2.19219	2.11	1.78241	2.01792	1.9
P49419	Alpha-aminoadipic semialdehyde dehydrogenase OS=Homo sapiens OX=9606 GN=ALDH7A1 PE=1 SV=5	1.93357	2.30159	2.11	1.67807	2.14078	1.9		√
P22392	Nucleoside diphosphate kinase B OS=Homo sapiens OX=9606 GN=NME2 PE=1 SV=1	1.96717	2.15381	2.06	1.66448	2.1375	1.9
Q9H3N1	Thioredoxin-related transmembrane protein 1 OS=Homo sapiens OX=9606 GN=TMX1 PE=1 SV=1	3.13914	3.17153	3.15	1.79077	1.99639	1.89	√	√
P37268	Squalene synthase OS=Homo sapiens OX=9606 GN=FDFT1 PE=1 SV=1	2.61117	2.60644	2.6	1.81103	1.98257	1.89	√	√
P48163	NADP-dependent malic enzyme OS=Homo sapiens OX=9606 GN=ME1 PE=1 SV=1	2.40054	2.67129	2.53	1.80735	1.98914	1.89
P04632	Calpain small subunit 1 OS=Homo sapiens OX=9606 GN=CAPNS1 PE=1 SV=1	2.36737	2.4957	2.43	1.76129	2.02857	1.89
O15020	Spectrin beta chain, non-erythrocytic 2 OS=Homo sapiens OX=9606 GN=SPTBN2 PE=1 SV=3	2.87381	1.77821	2.32	1.91456	1.8679	1.89
P53602	Diphosphomevalonate decarboxylase OS=Homo sapiens OX=9606 GN=MVD PE=1 SV=1	2.38128	2.22342	2.3	1.59932	2.19849	1.89
P27695	DNA-(apurinic or apyrimidinic site) endonuclease OS=Homo sapiens OX=9606 GN=APEX1 PE=1 SV=2	2.10434	2.42492	2.26	1.71809	2.08066	1.89
Q9H9E3	Conserved oligomeric Golgi complex subunit 4 OS=Homo sapiens OX=9606 GN=COG4 PE=1 SV=3	1.82782	2.58015	2.2	1.56071	2.23266	1.89
Q13641	Trophoblast glycoprotein OS=Homo sapiens OX=9606 GN=TPBG PE=1 SV=1	2.15056	2.24489	2.19	1.64616	2.15056	1.89	√
Q07065	Cytoskeleton-associated protein 4 OS=Homo sapiens OX=9606 GN=CKAP4 PE=1 SV=2	2.37295	2.926	2.64	1.77821	1.99277	1.88	√	√
Q9BRX8	Peroxiredoxin-like 2A OS=Homo sapiens OX=9606 GN=PRXL2A PE=1 SV=3	2.33056	2.59932	2.46	1.71809	2.04963	1.88	√	√
Q15019	Septin-2 OS=Homo sapiens OX=9606 GN=SEPTIN2 PE=1 SV=1	1.97453	2.83794	2.4	1.52105	2.24184	1.88
A0FGR8	Extended synaptotagmin-2 OS=Homo sapiens OX=9606 GN=ESYT2 PE=1 SV=1	1.94486	2.61824	2.28	1.55582	2.21101	1.88	√	√
Q15437	Protein transport protein Sec23B OS=Homo sapiens OX=9606 GN=SEC23B PE=1 SV=2	2.13422	2.38128	2.25	1.61353	2.14731	1.88
P36957	Dihydrolipoyllysine-residue succinyltransferase component of 2-oxoglutarate dehydrogenase complex, mitochondrial OS=Homo sapiens OX=9606 GN=DLST PE=1 SV=4	2.09085	2.21412	2.15	1.76129	2.01078	1.88
Q92888	Rho guanine nucleotide exchange factor 1 OS=Homo sapiens OX=9606 GN=ARHGEF1 PE=1 SV=2	2.46205	2.37573	2.41	1.65535	2.09085	1.87
P10644	cAMP-dependent protein kinase type I-alpha regulatory subunit OS=Homo sapiens OX=9606 GN=PRKAR1A PE=1 SV=1	2.29572	2.28983	2.29	1.91456	1.82782	1.87
P07741	Adenine phosphoribosyltransferase OS=Homo sapiens OX=9606 GN=APRT PE=1 SV=2	2.04963	2.33914	2.19	1.59932	2.15381	1.87
P61158	Actin-related protein 3 OS=Homo sapiens OX=9606 GN=ACTR3 PE=1 SV=3	2.22959	2.10769	2.16	1.7866	1.95977	1.87
Q09666	Neuroblast differentiation-associated protein AHNAK OS=Homo sapiens OX=9606 GN=AHNAK PE=1 SV=2	2.09761	2.23573	2.16	1.65535	2.08746	1.87		√
P62879	Guanine nucleotide-binding protein G(I)/G(S)/G(T) subunit beta-2 OS=Homo sapiens OX=9606 GN=GNB2 PE=1 SV=3	2.16992	2.04963	2.1	1.76553	1.9782	1.87
P55010	Eukaryotic translation initiation factor 5 OS=Homo sapiens OX=9606 GN=EIF5 PE=1 SV=2	2.82375	3.03386	2.92	1.88753	1.852	1.86
P38606	V-type proton ATPase catalytic subunit A OS=Homo sapiens OX=9606 GN=ATP6V1A PE=1 SV=2	2.02857	3.13093	2.57	1.50589	2.22033	1.86
P39748	Flap endonuclease 1 OS=Homo sapiens OX=9606 GN=FEN1 PE=1 SV=1	2.15704	2.65306	2.4	1.80323	1.926	1.86
P60842	Eukaryotic initiation factor 4A-I OS=Homo sapiens OX=9606 GN=EIF4A1 PE=1 SV=1	2.27501	2.31904	2.29	1.34483	2.38128	1.86
P52565	Rho GDP-dissociation inhibitor 1 OS=Homo sapiens OX=9606 GN=ARHGDIA PE=1 SV=3	2.17951	1.97085	2.07	1.73552	2.0036	1.86
P54886	Delta-1-pyrroline-5-carboxylate synthase OS=Homo sapiens OX=9606 GN=ALDH18A1 PE=1 SV=2	2.46205	2.30743	2.38	1.7866	1.91456	1.85		√
Q00325	Phosphate carrier protein, mitochondrial OS=Homo sapiens OX=9606 GN=SLC25A3 PE=1 SV=2	2.13093	2.57773	2.35	1.71809	1.98914	1.85	√	√
Q9P2E9	Ribosome-binding protein 1 OS=Homo sapiens OX=9606 GN=RRBP1 PE=1 SV=5	2.20163	2.22959	2.21	1.83592	1.87578	1.85		√
Q9H4A4	Aminopeptidase B OS=Homo sapiens OX=9606 GN=RNPEP PE=1 SV=2	2.05658	2.09424	2.07	1.66448	2.05311	1.85
Q14534	Squalene monooxygenase OS=Homo sapiens OX=9606 GN=SQLE PE=1 SV=3	2.67356	2.57531	2.62	1.80323	1.89142	1.84	√	√
Q96QD8	Sodium-coupled neutral amino acid transporter 2 OS=Homo sapiens OX=9606 GN=SLC38A2 PE=1 SV=2	2.56316	2.41954	2.49	1.73985	1.9486	1.84	√	√
P30153	Serine/threonine-protein phosphatase 2A 65 kDa regulatory subunit A alpha isoform OS=Homo sapiens OX=9606 GN=PPP2R1A PE=1 SV=4	2.22342	2.31325	2.26	1.848	1.83592	1.84
P11940	Polyadenylate-binding protein 1 OS=Homo sapiens OX=9606 GN=PABPC1 PE=1 SV=2	2.24489	2.22033	2.23	1.71809	1.96717	1.84
P42765	3-ketoacyl-CoA thiolase, mitochondrial OS=Homo sapiens OX=9606 GN=ACAA2 PE=1 SV=2	2.0321	2.39506	2.21	1.7866	1.89918	1.84
Q01518	Adenylyl cyclase-associated protein 1 OS=Homo sapiens OX=9606 GN=CAP1 PE=1 SV=5	2.22033	2.12102	2.17	1.77821	1.91073	1.84
P25787	Proteasome subunit alpha type-2 OS=Homo sapiens OX=9606 GN=PSMA2 PE=1 SV=2	1.67356	2.33628	2	1.5008	2.17951	1.84
Q9P258	Protein RCC2 OS=Homo sapiens OX=9606 GN=RCC2 PE=1 SV=2	2.40871	2.91073	2.65	1.90304	1.76129	1.83
P53582	Methionine aminopeptidase 1 OS=Homo sapiens OX=9606 GN=METAP1 PE=1 SV=2	2.3978	2.79909	2.59	1.70044	1.96717	1.83
Q8N5K1	CDGSH iron-sulfur domain-containing protein 2 OS=Homo sapiens OX=9606 GN=CISD2 PE=1 SV=1	2.49057	2.13093	2.31	1.66448	2.0072	1.83	√	√
P54920	Alpha-soluble NSF attachment protein OS=Homo sapiens OX=9606 GN=NAPA PE=1 SV=3	2.38128	2.12102	2.25	1.74416	1.92979	1.83
O00757	Fructose-1,6-bisphosphatase isozyme 2 OS=Homo sapiens OX=9606 GN=FBP2 PE=1 SV=2	1.75275	2.47508	2.11	1.42761	2.25096	1.83
P14868	Aspartate--tRNA ligase, cytoplasmic OS=Homo sapiens OX=9606 GN=DARS1 PE=1 SV=2	2.21412	1.848	2.03	1.69153	1.98185	1.83
O15173	Membrane-associated progesterone receptor component 2 OS=Homo sapiens OX=9606 GN=PGRMC2 PE=1 SV=1	3.21723	3.15543	3.18	1.75275	1.89918	1.82	√	√
P80404	4-aminobutyrate aminotransferase, mitochondrial OS=Homo sapiens OX=9606 GN=ABAT PE=1 SV=3	3.10601	3.0635	3.08	1.75275	1.88753	1.82
Q96AG4	Leucine-rich repeat-containing protein 59 OS=Homo sapiens OX=9606 GN=LRRC59 PE=1 SV=1	2.94111	3.12433	3.03	1.51602	2.1375	1.82	√	√
P33991	DNA replication licensing factor MCM4 OS=Homo sapiens OX=9606 GN=MCM4 PE=1 SV=5	2.488	2.40327	2.44	1.66903	1.9855	1.82
P26196	Probable ATP-dependent RNA helicase DDX6 OS=Homo sapiens OX=9606 GN=DDX6 PE=1 SV=2	2.42761	2.38128	2.4	1.85599	1.79494	1.82
Q8WWI5	Choline transporter-like protein 1 OS=Homo sapiens OX=9606 GN=SLC44A1 PE=1 SV=1	2.20789	2.21723	2.21	1.79909	1.848	1.82
Q15149	Plectin OS=Homo sapiens OX=9606 GN=PLEC PE=1 SV=3	2.02503	2.29572	2.16	1.67356	1.9855	1.82		√
Q9Y3E5	Peptidyl-tRNA hydrolase 2, mitochondrial OS=Homo sapiens OX=9606 GN=PTRH2 PE=1 SV=1	1.57046	2.56071	2.06	1.52105	2.12433	1.82		√
Q14847	LIM and SH3 domain protein 1 OS=Homo sapiens OX=9606 GN=LASP1 PE=1 SV=2	2.25399	1.85599	2.05	1.7137	1.92979	1.82
P05455	Lupus La protein OS=Homo sapiens OX=9606 GN=SSB PE=1 SV=2	2.16992	2.19219	2.18	1.63227	1.99277	1.81
Q16762	Thiosulfate sulfurtransferase OS=Homo sapiens OX=9606 GN=TST PE=1 SV=4	2.34767	1.99639	2.17	1.4957	2.12763	1.81
Q9UHD8	Septin-9 OS=Homo sapiens OX=9606 GN=SEPTIN9 PE=1 SV=2	2.32193	1.80735	2.06	1.74416	1.88362	1.81
P62263	40S ribosomal protein S14 OS=Homo sapiens OX=9606 GN=RPS14 PE=1 SV=3	2.10769	1.9782	2.04	1.69599	1.926	1.81
Q8NHH9	Atlastin-2 OS=Homo sapiens OX=9606 GN=ATL2 PE=1 SV=2	2.81762	2.91073	2.86	1.65076	1.95233	1.8	√	√
P07602	Prosaposin OS=Homo sapiens OX=9606 GN=PSAP PE=1 SV=2	2.09761	3.3147	2.7	1.38405	2.22959	1.8	√	√
Q562R1	Beta-actin-like protein 2 OS=Homo sapiens OX=9606 GN=ACTBL2 PE=1 SV=2	2.42223	2.9782	2.7	1.76129	1.84398	1.8
P30040	Endoplasmic reticulum resident protein 29 OS=Homo sapiens OX=9606 GN=ERP29 PE=1 SV=4	2.0635	2.40871	2.23	1.23879	2.37016	1.8		√
Q6PGP7	Tetratricopeptide repeat protein 37 OS=Homo sapiens OX=9606 GN=TTC37 PE=1 SV=1	2.11437	2.32769	2.22	1.55582	2.04614	1.8
O95817	BAG family molecular chaperone regulator 3 OS=Homo sapiens OX=9606 GN=BAG3 PE=1 SV=3	1.74846	2.38128	2.06	1.20163	2.40327	1.8
Q14739	Delta(14)-sterol reductase LBR OS=Homo sapiens OX=9606 GN=LBR PE=1 SV=2	2.47768	2.50843	2.49	1.73985	1.85997	1.79	√	√
Q99714	3-hydroxyacyl-CoA dehydrogenase type-2 OS=Homo sapiens OX=9606 GN=HSD17B10 PE=1 SV=3	2.37573	2.52607	2.45	1.58496	1.99639	1.79
P08237	ATP-dependent 6-phosphofructokinase, muscle type OS=Homo sapiens OX=9606 GN=PFKM PE=1 SV=2	2.14078	2.50843	2.32	1.45418	2.13093	1.79
Q15029	116 kDa U5 small nuclear ribonucleoprotein component OS=Homo sapiens OX=9606 GN=EFTUD2 PE=1 SV=1	2.01078	2.62059	2.31	1.46467	2.13093	1.79
P33993	DNA replication licensing factor MCM7 OS=Homo sapiens OX=9606 GN=MCM7 PE=1 SV=4	2.59932	2	2.29	1.85599	1.72683	1.79
P11172	Uridine 5'-monophosphate synthase OS=Homo sapiens OX=9606 GN=UMPS PE=1 SV=1	2.02148	2.56316	2.29	1.41143	2.18269	1.79
P62333	26S proteasome regulatory subunit 10B OS=Homo sapiens OX=9606 GN=PSMC6 PE=1 SV=1	1.9486	2.37573	2.16	1.38405	2.19849	1.79
Q9ULC4	Malignant T-cell-amplified sequence 1 OS=Homo sapiens OX=9606 GN=MCTS1 PE=1 SV=1	1.7137	2.38957	2.05	1.46467	2.13093	1.79
Q15233	Non-POU domain-containing octamer-binding protein OS=Homo sapiens OX=9606 GN=NONO PE=1 SV=4	2.01436	2.04963	2.03	1.69599	1.90304	1.79
Q14839	Chromodomain-helicase-DNA-binding protein 4 OS=Homo sapiens OX=9606 GN=CHD4 PE=1 SV=2	2.07724	2.15056	2.11	1.57046	2.0036	1.78
P63000	Ras-related C3 botulinum toxin substrate 1 OS=Homo sapiens OX=9606 GN=RAC1 PE=1 SV=1	2.06695	2.1177	2.09	1.60407	1.96717	1.78
O94919	Endonuclease domain-containing 1 protein OS=Homo sapiens OX=9606 GN=ENDOD1 PE=1 SV=2	2.69822	2.37573	2.53	1.52607	2.02857	1.77	√
Q96P70	Importin-9 OS=Homo sapiens OX=9606 GN=IPO9 PE=1 SV=3	2.19849	2.50843	2.35	1.49057	2.06695	1.77
P11766	Alcohol dehydrogenase class-3 OS=Homo sapiens OX=9606 GN=ADH5 PE=1 SV=4	2.27798	2.21723	2.24	1.42223	2.12433	1.77
P61224	Ras-related protein Rap-1b OS=Homo sapiens OX=9606 GN=RAP1B PE=1 SV=1	2.33628	1.848	2.09	1.76553	1.7866	1.77
Q70J99	Protein unc-13 homolog D OS=Homo sapiens OX=9606 GN=UNC13D PE=1 SV=1	2.12763	2.04264	2.08	1.69599	1.852	1.77
P04083	Annexin A1 OS=Homo sapiens OX=9606 GN=ANXA1 PE=1 SV=2	2.09761	2.05658	2.07	1.67356	1.87971	1.77
P68366	Tubulin alpha-4A chain OS=Homo sapiens OX=9606 GN=TUBA4A PE=1 SV=1	2.23573	1.85599	2.04	1.58015	1.94111	1.76
Q16401	26S proteasome non-ATPase regulatory subunit 5 OS=Homo sapiens OX=9606 GN=PSMD5 PE=1 SV=3	2.33914	2.11437	2.22	1.37851	2.13422	1.75
P28072	Proteasome subunit beta type-6 OS=Homo sapiens OX=9606 GN=PSMB6 PE=1 SV=4	2.51096	2.28096	2.39	1.74416	1.73985	1.74		√
Q15181	Inorganic pyrophosphatase OS=Homo sapiens OX=9606 GN=PPA1 PE=1 SV=2	2.63691	2.09761	2.36	1.80735	1.69153	1.74
P23381	Tryptophan--tRNA ligase, cytoplasmic OS=Homo sapiens OX=9606 GN=WARS1 PE=1 SV=2	2.17951	2.28392	2.23	1.58015	1.88753	1.73
P55209	Nucleosome assembly protein 1-like 1 OS=Homo sapiens OX=9606 GN=NAP1L1 PE=1 SV=1	2.03914	2.06005	2.04	1.53107	1.9486	1.73
Q9HB07	MYG1 exonuclease OS=Homo sapiens OX=9606 GN=MYG1 PE=1 SV=3	2.61117	2.6017	2.6	1.76553	1.67807	1.72
Q99536	Synaptic vesicle membrane protein VAT-1 homolog OS=Homo sapiens OX=9606 GN=VAT1 PE=1 SV=2	2.47768	2.36737	2.42	1.47508	1.9782	1.72		√
P09525	Annexin A4 OS=Homo sapiens OX=9606 GN=ANXA4 PE=1 SV=4	2.28096	2.52356	2.4	1.63227	1.81147	1.72
P23919	Thymidylate kinase OS=Homo sapiens OX=9606 GN=DTYMK PE=1 SV=4	2.01436	2.08066	2.04	1.60407	1.83996	1.72
Q9NZB2	Constitutive coactivator of PPAR-gamma-like protein 1 OS=Homo sapiens OX=9606 GN=FAM120A PE=1 SV=2	2.33628	2.67129	2.5	1.43829	1.98914	1.71
Q8TCJ2	Dolichyl-diphosphooligosaccharide--protein glycosyltransferase subunit STT3B OS=Homo sapiens OX=9606 GN=STT3B PE=1 SV=1	2.28392	2.68482	2.48	1.18269	2.25399	1.71	√	√
P11387	DNA topoisomerase 1 OS=Homo sapiens OX=9606 GN=TOP1 PE=1 SV=2	2.32481	2.33914	2.33	1.57046	1.85997	1.71
P00491	Purine nucleoside phosphorylase OS=Homo sapiens OX=9606 GN=PNP PE=1 SV=2	1.7137	2.44095	2.07	1.16992	2.26303	1.71
P50416	Carnitine O-palmitoyltransferase 1, liver isoform OS=Homo sapiens OX=9606 GN=CPT1A PE=1 SV=2	2.72683	2.83188	2.77	1.72247	1.68257	1.7	√	√
Q99829	Copine-1 OS=Homo sapiens OX=9606 GN=CPNE1 PE=1 SV=1	2.4957	2.27202	2.38	1.76129	1.65076	1.7
Q9BTW9	Tubulin-specific chaperone D OS=Homo sapiens OX=9606 GN=TBCD PE=1 SV=2	2.34767	2.41684	2.38	1.85997	1.55582	1.7
Q9NUQ8	ATP-binding cassette sub-family F member 3 OS=Homo sapiens OX=9606 GN=ABCF3 PE=1 SV=2	2	2.34199	2.17	1.36737	2.03914	1.7
Q9BR76	Coronin-1B OS=Homo sapiens OX=9606 GN=CORO1B PE=1 SV=1	2.16992	2.14078	2.15	1.69153	1.72683	1.7
Q8IWA5	Choline transporter-like protein 2 OS=Homo sapiens OX=9606 GN=SLC44A2 PE=1 SV=3	2.54102	2.76129	2.65	1.68257	1.70487	1.69
Q14318	Peptidyl-prolyl cis-trans isomerase FKBP8 OS=Homo sapiens OX=9606 GN=FKBP8 PE=1 SV=2	2.24489	2.19219	2.21	1.38405	2.0036	1.69	√
P32119	Peroxiredoxin-2 OS=Homo sapiens OX=9606 GN=PRDX2 PE=1 SV=5	2.19849	2.16992	2.18	1.54102	1.85599	1.69
P69905	Hemoglobin subunit alpha OS=Homo sapiens OX=9606 GN=HBA1 PE=1 SV=2	3.08236	3.05137	3.06	1.97085	1.38957	1.68
O43570	Carbonic anhydrase 12 OS=Homo sapiens OX=9606 GN=CA12 PE=1 SV=1	2.35332	2.69153	2.52	1.4957	1.87578	1.68
O60313	Dynamin-like 120 kDa protein, mitochondrial OS=Homo sapiens OX=9606 GN=OPA1 PE=1 SV=3	2.35614	2.46205	2.4	1.64616	1.70929	1.67	√	√
P52701	DNA mismatch repair protein Msh6 OS=Homo sapiens OX=9606 GN=MSH6 PE=1 SV=2	2.18587	2.40599	2.29	1.60881	1.74416	1.67
P63151	Serine/threonine-protein phosphatase 2A 55 kDa regulatory subunit B alpha isoform OS=Homo sapiens OX=9606 GN=PPP2R2A PE=1 SV=1	1.83592	3.47638	2.65	1.65992	1.66903	1.66
Q9BWD1	Acetyl-CoA acetyltransferase, cytosolic OS=Homo sapiens OX=9606 GN=ACAT2 PE=1 SV=2	2.29278	2.72028	2.5	1.64155	1.69153	1.66
Q9UBF2	Coatomer subunit gamma-2 OS=Homo sapiens OX=9606 GN=COPG2 PE=1 SV=1	2.25701	2.67129	2.46	1.22033	2.10434	1.66
Q96G23	Ceramide synthase 2 OS=Homo sapiens OX=9606 GN=CERS2 PE=1 SV=1	2.38128	2.39506	2.38	1.74846	1.58015	1.66	√	√
O95573	Long-chain-fatty-acid--CoA ligase 3 OS=Homo sapiens OX=9606 GN=ACSL3 PE=1 SV=3	1.9782	2.02148	1.99	1.61824	1.71809	1.66	√	√
P30837	Aldehyde dehydrogenase X, mitochondrial OS=Homo sapiens OX=9606 GN=ALDH1B1 PE=1 SV=3	2.79077	2.75702	2.77	1.4957	1.81558	1.65		√
Q6P1A2	Lysophospholipid acyltransferase 5 OS=Homo sapiens OX=9606 GN=LPCAT3 PE=1 SV=1	2.72465	2.75275	2.73	1.31615	2.0036	1.65	√	√
P40939	Trifunctional enzyme subunit alpha, mitochondrial OS=Homo sapiens OX=9606 GN=HADHA PE=1 SV=2	2.72683	2.53107	2.62	1.07724	2.22651	1.65		√
Q8WUY1	Protein THEM6 OS=Homo sapiens OX=9606 GN=THEM6 PE=1 SV=2	2.47508	2.23266	2.35	1.5008	1.81558	1.65	√	√
P62195	26S proteasome regulatory subunit 8 OS=Homo sapiens OX=9606 GN=PSMC5 PE=1 SV=1	1.96347	2.51349	2.23	1.63691	1.66448	1.65
Q96KP4	Cytosolic non-specific dipeptidase OS=Homo sapiens OX=9606 GN=CNDP2 PE=1 SV=2	2.46989	1.83996	2.15	1.63227	1.66448	1.64
Q93084	Sarcoplasmic/endoplasmic reticulum calcium ATPase 3 OS=Homo sapiens OX=9606 GN=ATP2A3 PE=1 SV=3	2.69153	2.55582	2.62	1.56071	1.7137	1.63		√
O60936	Nucleolar protein 3 OS=Homo sapiens OX=9606 GN=NOL3 PE=1 SV=2	1.99639	2.44361	2.22	1.04264	2.23573	1.63
P23921	Ribonucleoside-diphosphate reductase large subunit OS=Homo sapiens OX=9606 GN=RRM1 PE=1 SV=1	3.23573	2.72683	2.98	1.20163	2.04264	1.62
Q9HDC9	Adipocyte plasma membrane-associated protein OS=Homo sapiens OX=9606 GN=APMAP PE=1 SV=2	2.70044	2.67807	2.68	1.63691	1.60881	1.62	√	√
P48147	Prolyl endopeptidase OS=Homo sapiens OX=9606 GN=PREP PE=1 SV=2	2.09085	2.12763	2.1	1.53107	1.7137	1.62
Q92841	Probable ATP-dependent RNA helicase DDX17 OS=Homo sapiens OX=9606 GN=DDX17 PE=1 SV=2	2.32193	2.488	2.4	1.15704	2.07724	1.61
P02768	Albumin OS=Homo sapiens OX=9606 GN=ALB PE=1 SV=2	2.04	1.97	2.01	1.56	1.67	1.61	√	√
Q53GL7	Protein mono-ADP-ribosyltransferase PARP10 OS=Homo sapiens OX=9606 GN=PARP10 PE=1 SV=2	3.0993	2.38128	2.74	1.36737	1.84398	1.6
Q9NZ01	Very-long-chain enoyl-CoA reductase OS=Homo sapiens OX=9606 GN=TECR PE=1 SV=1	2.41684	2.38681	2.4	1.52607	1.67356	1.59	√	√
Q9BS26	Endoplasmic reticulum resident protein 44 OS=Homo sapiens OX=9606 GN=ERP44 PE=1 SV=1	2.37295	2.21412	2.29	1.4957	1.69153	1.59
P57678	Gem-associated protein 4 OS=Homo sapiens OX=9606 GN=GEMIN4 PE=1 SV=2	1.80735	2.62527	2.21	0.925999	2.26604	1.59
P51149	Ras-related protein Rab-7a OS=Homo sapiens OX=9606 GN=RAB7A PE=1 SV=1	2.28392	1.88362	2.08	1.43829	1.75702	1.59
P16615	Sarcoplasmic/endoplasmic reticulum calcium ATPase 2 OS=Homo sapiens OX=9606 GN=ATP2A2 PE=1 SV=1	2.61117	2.6893	2.65	1.57851	1.59455	1.58	√	√
P62258	14-3-3 protein epsilon OS=Homo sapiens OX=9606 GN=YWHAE PE=1 SV=1	2.16992	2.28096	2.22	1.4489	1.69153	1.57
Q96I24	Far upstream element-binding protein 3 OS=Homo sapiens OX=9606 GN=FUBP3 PE=1 SV=2	2.13093	2.26003	2.19	0.713696	2.43829	1.57		√
Q96A33	PAT complex subunit CCDC47 OS=Homo sapiens OX=9606 GN=CCDC47 PE=1 SV=1	2.67356	2.66448	2.66	1.32769	1.81147	1.56	√	√
Q08170	Serine/arginine-rich splicing factor 4 OS=Homo sapiens OX=9606 GN=SRSF4 PE=1 SV=2	2.33342	2.06695	2.2	1.36737	1.76129	1.56
Q9P035	Very-long-chain (3R)-3-hydroxyacyl-CoA dehydratase 3 OS=Homo sapiens OX=9606 GN=HACD3 PE=1 SV=2	1.9486	2.27501	2.11	1.53107	1.60407	1.56	√	√
Q9UBX3	Mitochondrial dicarboxylate carrier OS=Homo sapiens OX=9606 GN=SLC25A10 PE=1 SV=2	2.69599	2.72683	2.71	1.45418	1.64616	1.55	√	√
Q8TCT8	Signal peptide peptidase-like 2A OS=Homo sapiens OX=9606 GN=SPPL2A PE=1 SV=2	2.40054	2.852	2.62	1.46989	1.63227	1.55	√
O15127	Secretory carrier-associated membrane protein 2 OS=Homo sapiens OX=9606 GN=SCAMP2 PE=1 SV=2	2.03914	1.96347	2	1.70929	1.40054	1.55
Q96CN7	Isochorismatase domain-containing protein 1 OS=Homo sapiens OX=9606 GN=ISOC1 PE=1 SV=3	2.34199	2.31615	2.32	1.51096	1.58496	1.54
Q13011	Delta(3,5)-Delta(2,4)-dienoyl-CoA isomerase, mitochondrial OS=Homo sapiens OX=9606 GN=ECH1 PE=1 SV=2	2.29572	2.10098	2.19	1.55582	1.53605	1.54		√
P46977	Dolichyl-diphosphooligosaccharide--protein glycosyltransferase subunit STT3A OS=Homo sapiens OX=9606 GN=STT3A PE=1 SV=2	3.06695	2.65306	2.86	1.31034	1.76553	1.53	√	√
Q9H0U4	Ras-related protein Rab-1B OS=Homo sapiens OX=9606 GN=RAB1B PE=1 SV=1	2.29278	2.53107	2.41	1.26303	1.81558	1.53	√
Q9Y5M8	Signal recognition particle receptor subunit beta OS=Homo sapiens OX=9606 GN=SRPRB PE=1 SV=3	2.80116	2.85599	2.82	1.30451	1.74846	1.52	√	√
Q9UI12	V-type proton ATPase subunit H OS=Homo sapiens OX=9606 GN=ATP6V1H PE=1 SV=1	2.01436	2.20163	2.1	1.40599	1.63227	1.51
